# Supplementary material for: Integrative analysis of transcriptomes highlights potential functions of transfer-RNA-derived small RNAs in experimental intracerebral hemorrhage
Source: Aging (Albany NY). 2020 Nov 16;12(22):22794–813. doi: 10.18632/aging.103938 (PMC7746353; doi:10.18632/aging.103938)
Supplement: Supplementary Table 1 [file aging-12-103938-s002..xlsx]

## Sheet: Supplementary Table 3
Supplementary Table 3. The 89 targets of 7 ICH-responsive tsRNAs.
Target gene name	Gene Symbol	Type	Sites	TargetScan context+	miRanda structure	miRanda energy	RNAhybrid mfe (kcal/mol)
NM_001024344	Sit1	Coding	1	-0.085	147	-13.37	-21.6
NM_001034140	Baiap2l1	Coding	1	-0.197	148	-17.88	-25.3
NM_001081980	Tbc1d10c	Coding	1	-0.406	157	-14.89	-24.5
NM_001100653	Sidt1	Coding	1	-0.055	145	-13.52	-22.3
NM_001100986	Hipk1	Coding	1	-0.055	152	-13.25	-25.3
NM_001106846	Cldn2	Coding	2	-0.346	302	-26.71	-21.4
NM_001106938	Gpr174	Coding	1	-0.168	140	-11.97	-22.6
NM_001107030	Fndc8	Coding	1	-0.053	145	-14.02	-23.7
NM_001107934	Trim14	Coding	1	-0.072	149	-17.67	-25.4
NM_001108742	Slc41a2	Coding	1	-0.238	141	-11.03	-22.9
NM_001108940	Bhlhe22	Coding	1	-0.24	147	-12.97	-20.6
NM_001109219	Tmem243	Coding	1	-0.157	147	-13.04	-21.6
NM_001168524	Arhgap11a	Coding	1	-0.131	149	-16.08	-23.5
NM_001304733	Oprm1	Coding	2	-0.242	284	-29.68	-25
NM_012643	Ret	Coding	1	-0.174	148	-12.97	-24.4
NM_031510	Idh1	Coding	1	-0.201	147	-12.19	-25.8
NM_031662	Camkk1	Coding	1	-0.191	145	-11.59	-22.9
NM_053456	Plcl1	Coding	1	-0.113	149	-13.8	-25.9
NM_080906	Ddit4	Coding	1	-0.115	149	-24.51	-29.1
NM_001047893	Shroom2	Coding	1	-0.221	145	-13.73	-28
NM_001107344	Mylip	Coding	1	-0.159	142	-12.71	-27.6
NM_001104633	Sema3d	Coding	1	-0.266	145	-15.79	-25.6
NM_001108211	Ankrd23	Coding	1	-0.106	147	-15	-25.6
NM_053708	Gbx2	Coding	1	-0.336	140	-14.51	-25.6
NM_012857	Lamp1	Coding	1	-0.167	145	-20.66	-25.2
NM_001013900	Ino80e	Coding	1	-0.082	142	-14.58	-25
NM_001012192	Tssc1	Coding	1	-0.136	140	-12.47	-24.1
NM_001107034	Tbx4	Coding	1	-0.076	140	-15.52	-23.9
NM_001100750	Suclg2	Coding	1	-0.136	147	-18.79	-23.8
NM_001014240	Akr1c13	Coding	1	-0.182	142	-16.74	-22.8
NM_013078	Otc	Coding	1	-0.223	140	-12.77	-21.7
NM_001105832	Dlx3	Coding	1	-0.109	155	-14.48	-38.6
NM_031349	Aplnr	Coding	1	-0.119	153	-19.46	-37
NM_001011912	Polm	Coding	1	-0.232	156	-28.74	-36.6
NM_001017465	LOC361914	Coding	1	-0.105	163	-24.87	-35.8
NM_001077666	RGD1308065	Coding	1	-0.122	156	-17.72	-35.2
NM_024380	Gucy2e	Coding	1	-0.149	156	-24.48	-34.3
NM_057203	Ccl22	Coding	1	-0.282	167	-28.48	-34.1
NM_001109677	Zfp867	Coding	1	-0.15	147	-25.77	-33.7
NM_001108634	Pole4	Coding	1	-0.303	147	-17.95	-33.1
NM_001108665	Mrpl50	Coding	1	-0.332	165	-20.71	-32.7
NM_001013182	Hn1l	Coding	1	-0.224	159	-29.43	-31.1
NM_001106940	Lpar4	Coding	1	-0.164	151	-16.76	-31
NM_001109492	B3galt2	Coding	1	-0.106	161	-24.86	-30.3
NM_198790	Rgsl2h	Coding	1	-0.126	163	-24.01	-29.2
NM_001014024	Orai3	Coding	1	-0.248	161	-35.23	-47.3
NM_001107296	Ercc6	Coding	1	-0.228	157	-33.58	-48.9
NM_001108486	Lrrc28	Coding	1	-0.13	161	-29.46	-44.7
NM_001108829	Kdm6b	Coding	1	-0.226	148	-33.94	-44.1
NM_001271152	Paqr9	Coding	1	-0.227	165	-30.95	-44.8
NM_019385	Gorasp1	Coding	1	-0.308	173	-35.92	-45.3
NM_053367	Dhh	Coding	1	-0.541	162	-32.28	-44.1
NM_133621	Hopx	Coding	1	-0.251	169	-36.2	-40.1
NM_199486	Pcdha11	Coding	1	-0.262	167	-38.77	-47
NM_001033914	Epn2	Coding	1	-0.191	140	-14.01	-22.8
NM_001037349	Bloc1s2	Coding	1	-0.107	151	-19.83	-23
NM_001106747	Nek9	Coding	2	-0.374	302	-38.55	-24.5
NM_001108588	Slc5a12	Coding	1	-0.379	144	-15.43	-21.1
NM_001109271	Ldlrap1	Coding	1	-0.219	154	-12.84	-21.9
NM_001191693	Arhgap21	Coding	1	-0.233	149	-14.44	-23.3
NM_001191730	Shroom4	Coding	1	-0.153	145	-14.83	-21.4
NM_001271376	Cpamd8	Coding	1	-0.364	146	-13.81	-23.6
NM_013026	Sdc1	Coding	1	-0.052	146	-21.56	-24.1
NM_022194	Il1rn	Coding	1	-0.239	150	-14.96	-21.2
NM_030864	Mtr	Coding	1	-0.205	143	-16.41	-20.4
NM_053998	Rab8a	Coding	1	-0.167	145	-18.79	-22.4
NM_130426	Tnfrsf1b	Coding	1	-0.126	151	-22.35	-23.2
NM_133591	Rph3al	Coding	1	-0.131	147	-15.67	-21
NM_001033890	Rtfdc1	Coding	1	-0.111	154	-22.07	-27.3
NM_001106950	Rap2c	Coding	1	-0.176	146	-15.78	-28.4
NM_001108198	Guca1b	Coding	1	-0.263	169	-28.09	-34.1
NM_001108706	Efcab10	Coding	1	-0.227	146	-16.13	-28.6
NM_001108827	Iba57	Coding	1	-0.186	150	-14.74	-30.7
NM_021266	Fzd1	Coding	1	-0.217	148	-16.83	-32.2
NM_022590	Slc5a2	Coding	1	-0.221	146	-18.85	-29.8
NM_024141	Duox2	Coding	1	-0.407	152	-17.92	-30.3
NM_031096	Grk1	Coding	1	-0.214	163	-22.94	-29.2
NM_182816	Amigo2	Coding	1	-0.17	145	-13.04	-27.3
NM_001025287	Tipin	Coding	1	-0.169	143	-19.5	-32.4
NM_001030038	Zfp518a	Coding	1	-0.056	175	-28.45	-38.1
NM_001037209	Mterf4	Coding	1	-0.21	163	-36.54	-37.2
NM_001106088	Erlin2	Coding	1	-0.194	157	-28.75	-33.9
NM_001106140	Atp8b1	Coding	1	-0.242	146	-24.35	-41.7
NM_001106241	Rinl	Coding	1	-0.072	155	-18.44	-41.6
NM_001191068	Sgcb	Coding	1	-0.084	151	-21.75	-37.1
NM_001271151	Cetn4	Coding	1	-0.063	143	-21.06	-34.5
NM_024155	Anxa4	Coding	1	-0.092	169	-22.68	-37.3
NM_145184	Usp15	Coding	1	-0.119	165	-19.58	-33.6
NM_147206	Cyp3a9	Coding	1	-0.274	150	-20.09	-38.1
