# Supplementary material for: Integrative analysis of transcriptomes highlights potential functions of transfer-RNA-derived small RNAs in experimental intracerebral hemorrhage
Source: Aging (Albany NY). 2020 Nov 16;12(22):22794–813. doi: 10.18632/aging.103938 (PMC7746353; doi:10.18632/aging.103938)
Supplement: Supplementary Table 2 [file aging-12-103938-s003..xlsx]

## Sheet: Supplementary Table 1 
Supplementary Table 1 The 331 tsRNAs identified from rat brain of sham and ICH.
tsRNA Name	Origin tRNA	Type	Length	Sham 1 _TPM	Sham 2 _TPM	Sham 3 _TPM	ICH 1 _TPM	ICH 2 _TPM	ICH 3 _TPM	Fold change ICH vs Sham	Pvalue
rno-tiR5-Gly-31b	chr13.trna2246-GlyGCC	tiRNA-5	31	591.467	681.055	708.329	651.593	614.192	970.538	1.12878	0.5361
rno-tiR5-Gly-31a	chr19.trna1527-GlyGCC	tiRNA-5	31	5793.65	5944.9	6495.52	4829.29	3953.48	8024.39	-1.08488	0.7394
rno-tRF5-Gly-23a	chr13.trna3842-GlyTCC	tRF-5	23	0	0	250.552	451.896	485.64	222.931	4.58867	0.184
rno-tRF5-Val-23a	chr10.trna1308-ValCAC	tRF-5	23	22691.9	20655.4	90839.4	120498	142059	57606.3	2.38592	0.2
rno-tRF5-Asp-23a	chr13.trna2243-AspGTC	tRF-5	23	194.436	169.215	280.694	385.331	394.838	239.82	1.58028	0.117
rno-tiR5-Asp-32a	chr13.trna2243-AspGTC	tiRNA-5	32	398.39	497.855	421.983	395.644	331.582	461.625	-1.10855	0.4226
rno-tRF3-Leu-18b	chr4.trna6448-LeuAAG	tRF-3	18	418.786	549.599	386.19	324.39	218.334	443.61	-1.37221	0.2135
rno-tRF3-Pro-22a	chr1.trna4916-ProTGG	tRF-3	22	172.681	185.997	163.895	148.132	0	158.754	-1.69602	0.2949
rno-tRF3-Cys-17a	chr10.trna8976-CysGCA	tRF-3	17	202.594	241.935	235.482	181.884	0	226.309	-1.66105	0.3199
rno-tRF3-Gln-17b	chr17.trna3684-GlnCTG	tRF-3	17	1483.43	1847.38	1550.41	1240.37	799.878	1530.12	-1.36684	0.1652
rno-tRF3-Gln-17a	chr17.trna1911-GlnCTG	tRF-3	17	630.898	889.427	629.207	574.715	383.615	716.082	-1.28325	0.4
rno-tRF3-Thr-17a	chr15.trna915-ThrTGT	tRF-3	17	511.245	714.618	657.465	575.652	372.392	752.111	-1.10755	0.6583
rno-tRF3-Val-17a	chr17.trna1605-ValAAC	tRF-3	17	605.063	774.753	827.011	761.286	537.673	1104.52	1.08899	0.7401
rno-tRF3-Leu-18a	chr13.trna3830-LeuCAG	tRF-3	18	424.224	615.327	512.408	531.588	343.825	694.689	1.01167	0.9614
rno-tRF3-Leu-22c	chr13.trna3830-LeuCAG	tRF-3	22	1091.83	1666.98	1373.33	1490.7	796.817	1542.5	-1.07882	0.7497
rno-tRF3-Ser-18a	chr17.trna1587-SerAGA	tRF-3	18	666.25	770.557	535.014	470.647	334.643	684.556	-1.32286	0.2694
rno-tRF3-Ala-18a	chr3.trna1421-AlaCGC	tRF-3	18	501.727	623.718	519.943	413.457	280.569	560.705	-1.3106	0.246
rno-tRF3-Ile-18a	chr17.trna1603-IleAAT	tRF-3	18	768.227	818.105	638.626	609.404	437.688	909.739	-1.13681	0.5946
rno-tRF3-Gly-18a	chr13.trna2250-GlyTCC	tRF-3	18	179.48	0	0	0	0	0	-60.8265	0.505
rno-tRF3-Tyr-18a	chr15.trna916-TyrGTA	tRF-3	18	1324.34	1594.26	1262.18	1118.49	694.792	1468.19	-1.2738	0.3153
rno-tiR3-Arg-42a	chr4.trna1517-ArgCCT	tiRNA-3	42	0	0	145.057	0	0	146.369	1.00886	1
rno-tiR3-Arg-43a	chr4.trna1517-ArgCCT	tiRNA-3	43	629.538	402.759	499.221	546.588	406.06	580.972	1.00137	0.9938
rno-tiR3-Arg-42c	chr1.trna4154-ArgTCG	tiRNA-3	42	467.734	359.407	502.989	474.398	378.513	631.638	1.11583	0.5868
rno-tiR3-Asp-40b	chr7.trna8336-AspGTC	tiRNA-3	40	193.076	236.341	194.037	231.573	0	300.619	-1.17052	1
rno-tiR3-Asp-40a	chr13.trna2243-AspGTC	tiRNA-3	40	1185.65	1483.78	1179.29	1183.18	769.27	1789.08	-1.02863	1
rno-tiR3-Glu-39a	chr2.trna4366-GluTTC	tiRNA-3	39	395.671	504.848	446.473	565.339	382.595	1039.22	1.4742	0.3895
rno-tiR3-Glu-40a	chr13.trna2251-GluCTC	tiRNA-3	40	1656.11	2405.37	1910.23	2104.79	1292.66	2808.03	1.03913	0.8839
rno-tiR3-Gly-40a	chr10.trna705-GlyCCC	tiRNA-3	40	634.977	727.205	617.904	565.339	425.445	1159.69	1.08592	0.8253
rno-tiR3-Gly-41a	chr10.trna705-GlyCCC	tiRNA-3	41	235.227	243.334	226.062	183.759	0	319.76	-1.39703	0.5447
rno-tiR3-Gly-42a	chr10.trna705-GlyCCC	tiRNA-3	42	407.908	385.978	408.796	420.957	290.772	501.032	1.00836	0.9614
rno-tiR3-Lys-43a	chr10.trna465-LysCTT	tiRNA-3	43	727.436	381.782	380.538	454.709	332.602	550.572	-1.11326	1
rno-tiR3-Met-42b	chr19.trna3057-MetCAT	tiRNA-3	42	265.14	243.334	593.414	622.53	737.642	709.326	1.87575	0.0936
rno-tiR3-Met-43c	chr17.trna3725-MetCAT	tiRNA-3	43	201.235	237.74	216.643	261.575	200.99	332.145	1.21119	0.3458
rno-tiR3-Met-43b	chr19.trna3057-MetCAT	tiRNA-3	43	428.303	516.036	553.853	575.652	490.741	729.593	1.19837	0.2975
rno-tiR3-Thr-43a	chr14.trna5981-ThrCGT	tiRNA-3	43	508.525	450.307	470.963	510.024	393.817	551.698	1.01797	0.8771
rno-tiR3-Thr-43b	chr10.trna10494-ThrCGT	tiRNA-3	43	1234.6	974.734	998.442	1167.24	965.158	1392.76	1.09885	0.5215
rno-tiR3-Thr-42b	chr10.trna10494-ThrCGT	tiRNA-3	42	206.673	0	216.643	157.507	0	297.241	1.07373	0.9296
rno-tiR3-Val-42a	chr1.trna7481-ValTAC	tiRNA-3	42	815.816	990.117	921.204	1035.05	800.898	1351.1	1.16846	0.442
rno-tRF5-Ala-16a	chr3.trna1421-AlaCGC	tRF-5	16	711.12	613.928	491.686	344.079	260.164	369.3	-1.86344	0.0292
rno-tRF5-Ala-17a	chr17.trna1880-AlaAGC	tRF-5	17	256.982	191.59	143.173	137.819	0	208.294	-1.70359	0.3218
rno-tRF5-Ala-18a	chr3.trna1421-AlaCGC	tRF-5	18	533	418.143	312.72	255.95	232.617	399.7	-1.42142	0.2055
rno-tRF5-Ala-19a	chr3.trna1421-AlaCGC	tRF-5	19	1638.43	1025.08	966.417	1192.56	1231.44	910.865	-1.0884	0.708
rno-tRF5-Ala-20a	chr17.trna1880-AlaAGC	tRF-5	20	364.398	391.572	275.043	197.822	157.119	306.249	-1.5568	0.0992
rno-tRF5-Asn-19a	chr12.trna323-AsnGTT	tRF-5	19	201.235	198.583	0	0	0	218.427	-1.81919	1
rno-tRF5-Asp-19a	chr13.trna2243-AspGTC	tRF-5	19	1011.61	780.346	1100.17	888.792	754.986	884.969	-1.14353	0.4
rno-tiR5-Asp-36a	chr13.trna2243-AspGTC	tiRNA-5	36	497.648	462.894	450.241	412.52	411.162	757.74	1.1207	0.7
rno-tRF5-Gln-29a	chr17.trna1868-GlnCTG	tRF-5	29	2692.19	2143.86	1946.02	1456.01	1251.85	4700.69	1.09233	0.8703
rno-tRF5-Gln-29b	chr17.trna3717-GlnTTG	tRF-5	29	667.609	527.223	438.938	301.889	281.59	1049.35	-1.00057	0.7
rno-tRF5-Glu-26a	chr4.trna7782-GluCTC	tRF-5	26	327.686	300.671	237.365	209.072	148.957	244.323	-1.43507	0.0855
rno-tRF5-Glu-27a	chr4.trna7782-GluCTC	tRF-5	27	481.331	450.307	469.079	401.269	288.731	548.32	-1.13083	0.5469
rno-tiR5-Glu-36c	chr13.trna2251-GluCTC	tiRNA-5	36	1117.67	1018.09	1081.33	1014.42	1305.92	1342.09	1.1383	0.2863
rno-tRF5-Glu-39a	chr13.trna2251-GluCTC	tRF-5	39	1339.3	1166.32	1134.08	934.732	1008.01	5641.96	2.08299	0.7
rno-tRF5-Glu-29b	chr15.trna2099-GluTTC	tRF-5	29	1883.18	1879.54	1542.88	1225.37	802.938	1406.27	-1.54428	0.1
rno-tiR5-Glu-36b	chr15.trna2099-GluTTC	tiRNA-5	36	474.533	408.353	877.875	1003.17	1206.96	931.131	1.7827	0.0679
rno-tRF5-Glu-29a	chr9.trna932-GluTTC	tRF-5	29	5984.01	5258.25	4234.9	3316.1	2253.74	3779.69	-1.65518	0.0404
rno-tRF5-Glu-31a	chr9.trna932-GluTTC	tRF-5	31	663.53	555.193	497.337	424.708	325.46	716.082	-1.17003	0.5639
rno-tiR5-Glu-36a	chr9.trna932-GluTTC	tiRNA-5	36	757.349	685.25	1525.92	2021.35	2240.47	1504.22	1.94144	0.057
rno-tRF5-Gly-19a	chr13.trna2250-GlyTCC	tRF-5	19	1332.5	802.722	689.49	1000.36	792.736	766.748	-1.10335	0.709
rno-tiR5-Lys-36a	chr10.trna465-LysCTT	tiRNA-5	36	920.512	860.059	708.329	531.588	365.25	754.363	-1.50641	0.1153
rno-tiR5-Lys-36b	chr6.trna6230-LysCTT	tiRNA-5	36	1022.49	1044.66	779.915	520.337	392.797	734.096	-1.72707	0.039
rno-tRF5-Pro-27a	chr10.trna464-ProCGG	tRF-5	27	1668.34	1294.98	1132.2	948.795	660.103	1317.32	-1.39919	0.193
rno-tRF5-Pro-28a	chr10.trna464-ProCGG	tRF-5	28	478.612	458.698	399.377	300.014	236.698	991.931	1.14328	0.8166
rno-tRF5-Pro-29a	chr10.trna464-ProCGG	tRF-5	29	686.645	548.2	478.499	408.769	328.521	1500.84	1.30576	0.6907
rno-tiR5-Asp-35a	chr13.trna2243-AspGTC	tiRNA-5	35	1467.11	1672.57	1426.08	1385.69	849.87	1444.55	-1.24046	0.2555
rno-tiR5-Asp-35b	chr7.trna8336-AspGTC	tiRNA-5	35	259.701	290.882	226.062	212.823	0	238.694	-1.71533	0.286
rno-tiR5-Glu-33c	chr13.trna2251-GluCTC	tiRNA-5	33	7521.82	5770.09	7281.09	7923.19	5907.26	7688.87	1.04599	0.7268
rno-tiR5-Glu-35b	chr13.trna2251-GluCTC	tiRNA-5	35	9357.41	10653.5	7019.24	7354.1	4947.2	7277.91	-1.3805	0.14
rno-tiR5-Glu-33b	chr15.trna2099-GluTTC	tiRNA-5	33	2568.46	3146.56	2901.13	2566.06	2143.55	3288.8	-1.0772	0.6209
rno-tiR5-Glu-35a	chr15.trna2099-GluTTC	tiRNA-5	35	1200.61	1612.44	1297.97	1363.19	940.672	1241.88	-1.15929	0.3463
rno-tiR5-Glu-33a	chr9.trna932-GluTTC	tiRNA-5	33	2911.1	3206.69	2901.13	2590.44	2024.18	3255.02	-1.14599	0.3958
rno-tiR5-Glu-35d	chr9.trna932-GluTTC	tiRNA-5	35	1582.68	1791.44	1328.12	1426.94	950.875	1358.98	-1.25815	0.1839
rno-tiR5-Gly-32c	chr2.trna7579-GlyCCC	tiRNA-5	32	243.385	166.418	199.688	239.074	182.625	203.791	1.02612	0.8575
rno-tiR5-Gly-32b	chr13.trna2246-GlyGCC	tiRNA-5	32	8082.02	7427.28	8375.61	9883.59	7546.8	7301.55	1.03546	0.7709
rno-tiR5-Gly-32a	chr19.trna1527-GlyGCC	tiRNA-5	32	82314.5	69450.8	71450.8	76114.6	57119.8	57753.8	-1.16874	0.232
rno-tiR5-Lys-33a	chr10.trna465-LysCTT	tiRNA-5	33	3192.56	2314.47	2886.06	3847.68	2927.1	3303.43	1.2007	0.2046
rno-tiR5-Lys-35a	chr10.trna465-LysCTT	tiRNA-5	35	2127.92	2083.72	2023.26	1527.26	1084.53	1937.7	-1.37022	0.1482
rno-tiR5-Lys-35b	chr6.trna6230-LysCTT	tiRNA-5	35	1626.19	1611.04	1281.02	844.728	656.022	1125.91	-1.71933	0.025
rno-tiR5-Phe-33a	chr7.trna427-PheGAA	tiRNA-5	33	329.046	439.12	499.221	370.33	360.149	416.588	-1.10462	0.5129
rno-tiR5-Pro-33a	chr10.trna464-ProCGG	tiRNA-5	33	482.691	511.84	489.802	435.021	325.46	526.928	-1.15261	0.3767
rno-tiR5-Pro-33b	chr15.trna917-ProTGG	tiRNA-5	33	1507.9	1451.61	1603.16	1534.76	1198.8	1648.34	-1.04123	0.7061
rno-tiR5-Pro-31a	chr10.trna464-ProCGG	tiRNA-5	31	572.431	640.499	423.867	495.961	486.66	640.645	-1.00832	0.9585
rno-tiR5-Pro-32a	chr10.trna464-ProCGG	tiRNA-5	32	2422.97	2240.35	2456.54	1964.16	1569.15	2202.29	-1.24122	0.117
rno-tiR5-Trp-32a	chr7.trna8337-TrpCCA	tiRNA-5	32	0	0	199.688	0	0	0	-67.5628	0.505
rno-tiR5-Trp-32b	chr10.trna11601-TrpCCA	tiRNA-5	32	0	0	173.314	0	0	0	-58.7715	0.505
rno-tiR5-Val-33a	chr10.trna1308-ValCAC	tiRNA-5	33	795.421	879.638	819.476	737.848	646.84	712.704	-1.18908	0.0233
rno-tRFi-Cys-21a	chr4.trna1756-CysGCA	i-tRF	21	0	0	610.368	794.1	1098.81	333.271	3.63433	0.184
rno-tRFi-Gln-18c	chr17.trna1868-GlnCTG	i-tRF	18	4268.08	3648.61	11131.7	11950.9	18257.4	5719.65	1.886	0.2744
rno-tRFi-Gln-32c	chr17.trna1868-GlnCTG	i-tRF	32	1075.52	875.442	3277.9	4575.22	7319.29	2192.16	2.69305	0.1749
rno-tRFi-Gln-21a	chr17.trna1868-GlnCTG	i-tRF	21	1177.49	560.787	550.085	2061.66	3512.73	1221.62	2.96723	0.1
rno-tRFi-Gln-35a	chr2.trna4450-GlnCTG	i-tRF	35	679.847	380.384	346.629	1253.5	1991.53	1020.08	3.02733	0.0691
rno-tRFi-Gln-16a	chr17.trna1911-GlnCTG	i-tRF	16	932.75	847.473	646.162	546.588	411.162	539.313	-1.61952	0.0479
rno-tRFi-Gln-18a	chrX.trna146-GlnTTG	i-tRF	18	492.209	507.645	1416.66	1649.14	2290.47	803.903	1.96176	0.2
rno-tRFi-Gln-18b	chrX.trna146-GlnTTG	i-tRF	18	214.832	194.387	160.127	0	0	195.909	-2.87743	0.3758
rno-tRFi-Glu-16a	chr13.trna4006-GluCTC	i-tRF	16	218.911	0	0	320.64	417.283	229.687	4.37388	0.0765
rno-tRFi-Gly-22a	chr13.trna2246-GlyGCC	i-tRF	22	231.148	166.418	1100.17	1319.13	1822.17	567.461	2.47329	0.1966
rno-tRFi-Lys-29a	chr10.trna465-LysCTT	i-tRF	29	0	0	474.731	536.275	832.526	283.73	3.46541	0.184
rno-tRFi-Lys-33a	chr10.trna465-LysCTT	i-tRF	33	1029.29	739.791	561.388	284.076	366.27	919.872	-1.48324	0.3609
rno-tRFi-Lys-33b	chr6.trna6230-LysCTT	i-tRF	33	640.416	425.135	271.275	142.507	194.868	467.254	-1.65896	0.2941
rno-tRFi-Lys-32a	chr10.trna465-LysCTT	i-tRF	32	557.474	296.476	265.623	0	150.997	737.474	-1.25924	0.7747
rno-tRFi-Lys-20a	chr17.trna719-LysCTT	i-tRF	20	205.314	199.981	0	0	0	159.88	-2.50672	0.3537
rno-tRFi-Met-20a	chr17.trna1866-MetCAT	i-tRF	20	0	0	0	139.694	0	0	47.5647	0.505
rno-tRFi-Met-21a	chr17.trna1866-MetCAT	i-tRF	21	0	0	0	152.82	0	0	51.9399	0.505
rno-tRFi-Thr-16b	chr17.trna1881-ThrCGT	i-tRF	16	0	0	0	0	141.815	0	48.2717	0.505
rno-tRFi-Gly-19a	chr13.trna2246-GlyGCC	i-tRF	19	441.9	299.273	1345.07	2147.91	2695.51	658.66	2.63496	0.196
rno-tRFi-Gly-16a	chr2.trna7579-GlyCCC	i-tRF	16	182.199	219.56	171.431	195.947	182.625	215.05	1.03546	0.718
rno-tRFi-Val-20a	chr17.trna1607-ValCAC	i-tRF	20	342.643	337.031	408.796	366.58	400.959	390.692	1.06391	0.4296
rno-tRF5-Val-22a	chr17.trna1607-ValCAC	tRF-5	22	278.737	172.012	651.813	830.664	924.348	423.344	1.97307	0.1657
rno-tRF3-Trp-19a	chr10.trna2467-TrpCCA	tRF-3	19	296.413	318.851	273.159	239.074	142.835	308.501	-1.28556	0.3014
rno-tRF3-Leu-19a	chr4.trna6448-LeuAAG	tRF-3	19	322.247	374.79	259.972	246.574	167.321	308.501	-1.32343	0.2144
rno-tRF3-Thr-19b	chr10.trna2464-ThrAGT	tRF-3	19	531.64	725.806	632.975	479.085	260.164	659.786	-1.35048	0.2949
rno-tRF3-Ser-19a	chr17.trna1587-SerAGA	tRF-3	19	512.604	597.147	427.635	406.894	260.164	529.18	-1.28447	0.2951
rno-tiR3-Met-40a	chr19.trna3057-MetCAT	tiRNA-3	40	194.436	212.567	199.688	0	0	313.004	-1.92938	0.6579
rno-tiR3-Glu-38a	chr2.trna4366-GluTTC	tiRNA-3	38	0	0	167.663	209.072	183.645	427.847	4.82568	0.0765
rno-tiR3-Glu-39b	chr2.trna4366-GluTTC	tiRNA-3	39	187.638	254.522	252.436	269.075	245.881	399.7	1.31546	0.2638
rno-tRF3-Val-16b	chr17.trna1605-ValAAC	tRF-3	16	0	149.636	152.592	0	0	174.517	-1.71943	1
rno-tiR3-Val-40a	chr1.trna7481-ValTAC	tiRNA-3	40	375.275	385.978	310.836	380.643	355.048	579.846	1.22644	0.3739
rno-tRF3-Arg-36c	chr17.trna3723-ArgCCG	tRF-3	36	0	0	178.966	243.762	296.893	0	2.98767	0.3537
rno-tRF3-Arg-36d	chr1.trna4154-ArgTCG	tRF-3	36	0	0	0	150.007	169.362	0	107.456	0.185
rno-tRF3-Arg-35a	chr4.trna1517-ArgCCT	tRF-3	35	0	0	154.476	136.882	164.261	166.635	2.98952	0.184
rno-tRF3-Ser-26a	chr20.trna1886-SerTGA	tRF-3	26	0	0	148.824	0	0	0	-50.6081	0.505
rno-tRF3-Trp-18a	chr10.trna2467-TrpCCA	tRF-3	18	477.252	471.285	437.054	351.579	218.334	423.344	-1.39381	0.1565
rno-tRF3-Thr-18b	chr10.trna2464-ThrAGT	tRF-3	18	603.704	833.488	578.343	635.655	350.967	791.518	-1.13328	0.6358
rno-tRF3-Ala-19a	chr3.trna1421-AlaCGC	tRF-3	19	590.107	692.243	482.266	509.087	304.035	606.868	-1.24218	0.3544
rno-tRF3-Cys-18a	chr10.trna8976-CysGCA	tRF-3	18	203.954	241.935	201.572	193.134	135.694	225.183	-1.16777	0.3666
rno-tRF3-Met-23a	chr17.trna1584-MetCAT	tRF-3	23	357.599	377.587	395.609	294.389	193.848	377.181	-1.30559	0.234
rno-tRF3-Thr-18a	chr15.trna915-ThrTGT	tRF-3	18	290.974	304.867	299.533	235.324	169.362	350.159	-1.18543	0.4689
rno-tRF3-Gln-18a	chr17.trna1868-GlnCTG	tRF-3	18	3036.2	4282.12	3526.57	2931.7	1752.79	3897.92	-1.26353	0.3661
rno-tRF3-Gln-18b	chr17.trna1911-GlnCTG	tRF-3	18	727.436	956.554	791.218	693.783	373.412	953.649	-1.2245	0.4719
rno-tRF3-Gly-19a	chr13.trna2250-GlyTCC	tRF-3	19	0	160.824	0	0	0	0	-54.608	0.505
rno-tRF3-Gly-19b	chr2.trna7579-GlyCCC	tRF-3	19	237.946	292.28	167.663	167.82	0	270.219	-1.58917	0.3957
rno-tRF3-Tyr-19a	chr15.trna916-TyrGTA	tRF-3	19	3059.31	3568.9	2982.14	2499.49	1518.13	3095.14	-1.35099	0.2042
rno-tiR3-Gly-39a	chr10.trna705-GlyCCC	tiRNA-3	39	989.857	632.109	1328.12	1497.26	1697.7	1919.68	1.73298	0.0482
rno-tRF3-Gln-21a	chr17.trna3954-GlnTTG	tRF-3	21	424.224	493.66	484.15	406.894	192.828	433.477	-1.35595	0.2437
rno-tRF3-Trp-16a	chr10.trna2467-TrpCCA	tRF-3	16	698.882	709.024	631.091	525.025	337.703	765.622	-1.25172	0.3845
rno-tRF3-Asn-16a	chr12.trna323-AsnGTT	tRF-3	16	160.444	206.974	158.244	146.257	0	204.916	-1.49266	0.443
rno-tRF3-Leu-16c	chr4.trna6448-LeuAAG	tRF-3	16	387.513	461.495	273.159	259.7	158.139	360.293	-1.44043	0.2255
rno-tRF3-Lys-16a	chr9.trna186-LysCTT	tRF-3	16	909.635	1162.13	1215.09	991.922	546.855	1303.81	-1.15612	0.5836
rno-tRF3-Leu-16a	chr13.trna2365-LeuCAG	tRF-3	16	0	0	190.269	195.009	0	221.805	2.17217	0.3537
rno-tRF3-Leu-16b	chr13.trna3830-LeuCAG	tRF-3	16	1354.25	1997.02	1989.35	1860.09	1059.02	2588.48	1.03125	1
rno-tRF3-Thr-16b	chr10.trna2474-ThrAGT	tRF-3	16	292.334	376.189	354.164	290.639	193.848	362.544	-1.20665	0.365
rno-tRF3-Val-16c	chr6.trna7347-ValTAC	tRF-3	16	496.288	639.101	574.575	479.085	273.428	622.631	-1.24295	0.3918
rno-tRF3-Lys-17a	chr9.trna186-LysCTT	tRF-3	17	416.066	534.216	550.085	464.085	299.954	645.149	-1.06457	0.7991
rno-tRF3-Val-17b	chr6.trna7347-ValTAC	tRF-3	17	286.895	391.572	373.003	351.579	185.686	430.099	-1.08667	0.7477
rno-tRF3-Ala-17a	chr3.trna1421-AlaCGC	tRF-3	17	386.153	520.231	399.377	401.269	228.536	478.514	-1.17766	0.4935
rno-tRF3-Ile-16b	chr17.trna3693-IleAAT	tRF-3	16	0	185.997	0	0	0	159.88	-1.16034	1
rno-tRF3-Ile-17a	chr17.trna1603-IleAAT	tRF-3	17	2834.96	3125.58	2599.72	2322.3	1587.51	3284.29	-1.18982	0.4562
rno-tRF3-Ala-16b	chr17.trna1873-AlaAGC	tRF-3	16	262.421	303.468	243.017	180.946	150.997	296.115	-1.28658	0.3065
rno-tRF3-Ala-16a	chr3.trna1421-AlaCGC	tRF-3	16	1299.87	1577.47	1179.29	1122.24	719.278	1415.27	-1.24537	0.3315
rno-tRF3-Gly-16a	chr2.trna7579-GlyCCC	tRF-3	16	248.824	310.46	265.623	215.635	0	296.115	-1.60837	0.3589
rno-tRF3-Ile-16a	chr17.trna1603-IleAAT	tRF-3	16	2137.44	2215.18	1823.57	1556.32	994.746	2161.76	-1.31031	0.2825
rno-tRF3-Tyr-16a	chr15.trna916-TyrGTA	tRF-3	16	1230.52	1454.41	1375.21	1212.25	761.108	1503.1	-1.16776	0.4669
rno-tRF3-Val-16a	chr10.trna1308-ValCAC	tRF-3	16	1962.04	2843.09	2774.92	2650.44	1530.38	3606.3	1.02731	0.924
rno-tRF3-Cys-16a	chr4.trna1776-CysGCA	tRF-3	16	377.995	523.028	399.377	373.143	231.597	510.039	-1.16606	0.5482
rno-tRF3-Phe-16a	chrX.trna1633-PheGAA	tRF-3	16	247.464	335.633	243.017	268.138	192.828	325.389	-1.05037	0.8002
rno-tRF3-Ser-16a	chr5.trna455-SerAGA	tRF-3	16	1594.92	1838.99	1254.65	1122.24	848.85	1623.57	-1.30406	0.2724
rno-tRF3-Asn-37a	chr12.trna323-AsnGTT	tRF-3	37	0	185.997	150.708	0	0	198.161	-1.68872	1
rno-tRF3-Leu-21b	chr1.trna12832-LeuTAG	tRF-3	21	560.194	676.86	535.014	458.459	319.339	571.965	-1.31218	0.1892
rno-tRF3-Leu-21a	chr13.trna3830-LeuCAG	tRF-3	21	470.454	570.576	640.51	453.772	235.678	529.18	-1.37893	0.2195
rno-tRF3-Phe-21a	chr7.trna427-PheGAA	tRF-3	21	341.283	304.867	271.275	227.823	0	269.094	-1.84115	0.232
rno-tRF3-Glu-37a	chr2.trna4366-GluTTC	tRF-3	37	214.832	248.928	210.992	144.382	135.694	273.597	-1.2175	0.4641
rno-tRF3-Glu-27a	chr13.trna4006-GluCTC	tRF-3	27	388.872	514.637	497.337	383.456	216.293	535.935	-1.23287	0.4497
rno-tRF3-Thr-16a	chr15.trna915-ThrTGT	tRF-3	16	357.599	457.3	371.119	344.079	194.868	439.107	-1.21198	0.4432
rno-tRF3-Gln-16a	chr17.trna3717-GlnTTG	tRF-3	16	515.324	689.446	644.278	457.522	313.217	650.779	-1.30012	0.2873
rno-tRF3-Tyr-20a	chr15.trna916-TyrGTA	tRF-3	20	809.017	936.975	870.34	680.657	355.048	799.399	-1.42502	0.1823
rno-tRF3-Val-38a	chr1.trna7481-ValTAC	tRF-3	38	439.181	439.12	478.499	335.641	236.698	606.868	-1.15022	0.7
rno-tRF3-Asn-18a	chr12.trna323-AsnGTT	tRF-3	18	191.717	184.598	163.895	0	0	180.146	-2.96599	0.184
rno-tRF3-Phe-24a	chr7.trna427-PheGAA	tRF-3	24	300.492	366.399	384.306	292.514	200.99	378.307	-1.20506	0.3741
rno-tRF3-Arg-37a	chr2.trna6815-ArgTCT	tRF-3	37	0	0	194.037	143.444	0	203.791	1.77751	0.6428
rno-tRF3-Thr-22a	chr15.trna915-ThrTGT	tRF-3	22	183.559	191.59	143.173	152.82	0	181.272	-1.54653	0.3904
rno-tRF3-Trp-16b	chr7.trna8337-TrpCCA	tRF-3	16	198.515	190.192	156.36	0	0	170.013	-3.16778	0.184
rno-tRF3-Trp-17a	chr10.trna2467-TrpCCA	tRF-3	17	632.257	748.182	661.232	563.464	328.521	744.229	-1.24735	0.3795
rno-tRF3-Leu-17c	chr4.trna6448-LeuAAG	tRF-3	17	401.11	432.127	286.346	278.451	202.01	389.566	-1.28585	0.3042
rno-tRF3-Leu-17a	chr13.trna2365-LeuCAG	tRF-3	17	0	0	177.082	198.759	0	254.457	2.53338	0.3537
rno-tRF3-Leu-17b	chr13.trna3830-LeuCAG	tRF-3	17	1023.85	1300.58	1397.82	1226.31	693.771	1601.05	-1.05707	0.8313
rno-tRF3-Thr-17c	chr17.trna3937-ThrAGT	tRF-3	17	0	181.801	182.734	0	0	175.643	-2.05737	0.3537
rno-tRF3-Thr-17b	chr10.trna2464-ThrAGT	tRF-3	17	1097.27	1350.92	1071.91	969.421	577.463	1351.1	-1.21445	0.4601
rno-tRF3-Pro-17a	chr1.trna4916-ProTGG	tRF-3	17	233.867	286.686	246.785	219.385	185.686	284.856	-1.11172	0.4917
rno-tRF3-Tyr-17a	chr15.trna916-TyrGTA	tRF-3	17	1165.26	1399.87	1252.76	1080.05	714.176	1418.65	-1.18813	0.4306
rno-tRF3-Ser-17a	chr5.trna455-SerAGA	tRF-3	17	1990.59	2150.85	1488.24	1321.94	949.855	1834.11	-1.37085	0.1972
rno-tRF3-Met-22a	chr17.trna1584-MetCAT	tRF-3	22	339.923	391.572	314.603	249.387	153.038	324.263	-1.43774	0.1522
rno-tRF3-Leu-22d	chr1.trna12832-LeuTAG	tRF-3	22	335.844	321.648	214.759	229.698	188.747	280.353	-1.24716	0.2893
rno-tRF3-Arg-22a	chr15.trna1072-ArgACG	tRF-3	22	594.186	704.829	774.264	627.217	310.157	832.051	-1.17143	0.5817
rno-tRF3-Ala-22a	chr2.trna2176-AlaAGC	tRF-3	22	195.796	185.997	148.824	0	0	186.902	-2.80996	0.3758
rno-tRF3-Phe-38a	chr7.trna427-PheGAA	tRF-3	38	887.88	1006.9	909.901	805.351	468.296	1057.23	-1.20301	0.4539
rno-tRF3-Met-38a	chr19.trna3057-MetCAT	tRF-3	38	326.326	321.648	329.674	258.762	185.686	387.315	-1.17476	0.4961
rno-tRF3-Ser-27c	chr1.trna11538-SerGCT	tRF-3	27	379.354	430.729	454.009	390.956	261.185	528.054	-1.07091	0.7562
rno-tRF3-Gly-18b	chr2.trna7579-GlyCCC	tRF-3	18	428.303	517.434	412.564	363.767	205.071	443.61	-1.34059	0.2381
rno-tRF3-Leu-23a	chr13.trna3830-LeuCAG	tRF-3	23	403.829	509.043	570.807	432.208	189.767	490.899	-1.3323	0.3202
rno-tRF3-Arg-23a	chr15.trna1072-ArgACG	tRF-3	23	401.11	503.449	535.014	411.582	198.949	522.424	-1.26992	0.402
rno-tRF3-Phe-23a	chr7.trna427-PheGAA	tRF-3	23	848.449	1033.47	1105.82	809.101	400.959	1035.84	-1.32987	0.3161
rno-tRF3-Ile-34a	chr17.trna1603-IleAAT	tRF-3	34	586.028	462.894	1216.97	1443.82	2092.54	873.71	1.94503	0.1767
rno-tiR3-Thr-42a	chr15.trna915-ThrTGT	tiRNA-3	42	216.191	0	0	144.382	0	175.643	1.47371	1
rno-tRF3-Leu-39a	chr1.trna12832-LeuTAG	tRF-3	39	0	0	229.83	278.451	435.648	166.635	3.79562	0.184
rno-tRF3-Ala-29a	chr2.trna2176-AlaAGC	tRF-3	29	174.041	183.2	0	176.258	167.321	222.931	1.58092	0.3632
rno-tiR5-Ser-33a	chr17.trna1587-SerAGA	tiRNA-5	33	896.038	876.841	989.023	894.417	766.209	827.547	-1.10988	0.1466
rno-tiR3-Thr-42c	chr10.trna10494-ThrCGT	tiRNA-3	42	0	0	0	138.757	0	161.006	100.921	0.1857
rno-tRFi-Cys-20a	chr4.trna1756-CysGCA	i-tRF	20	363.038	158.027	231.714	685.345	895.781	524.676	2.79024	0.0326
rno-tRFi-Thr-16a	chr15.trna915-ThrTGT	i-tRF	16	0	0	0	0	173.443	0	58.8143	0.505
rno-tRFi-Arg-20a	chr17.trna1585-ArgTCG	i-tRF	20	0	0	0	261.575	355.048	183.524	267.716	0.0329
rno-tRF3-Ala-33a	chr2.trna2176-AlaAGC	tRF-3	33	224.349	208.372	0	0	0	149.747	-2.85258	0.3537
rno-tRF3-Phe-35a	chr7.trna427-PheGAA	tRF-3	35	197.156	160.824	0	195.009	226.496	164.383	1.63136	0.3364
rno-tRF3-Phe-37a	chr7.trna427-PheGAA	tRF-3	37	341.283	408.353	312.72	350.642	203.03	410.959	-1.10099	0.6665
rno-tRF3-Met-29a	chr17.trna1584-MetCAT	tRF-3	29	375.275	408.353	384.306	324.39	216.293	377.181	-1.27156	0.2169
rno-tiR3-Arg-42b	chr17.trna1586-ArgTCG	tiRNA-3	42	220.27	201.38	303.3	245.637	221.395	335.522	1.10661	0.6098
rno-tRFi-Ser-21b	chr10.trna2475-SerCGA	i-tRF	21	292.334	151.035	169.547	552.214	644.799	284.856	2.41083	0.1
rno-tRFi-Cys-16a	chr4.trna1767-CysGCA	i-tRF	16	0	0	0	157.507	222.415	0	127.641	0.1952
rno-tRF3-Met-27a	chr17.trna1584-MetCAT	tRF-3	27	658.092	820.902	730.935	634.718	395.858	807.281	-1.20212	0.4144
rno-tRFi-Ser-26b	chr17.trna3674-SerGCT	i-tRF	26	1385.53	1191.5	987.139	780.975	535.632	1082	-1.48532	0.1244
rno-tRFi-His-49a	chr3.trna3497-HisGTG	i-tRF	49	27660.2	46739.7	35633.1	31828.7	51068.7	16834.7	-1.10328	0.7812
rno-tRF3-Ser-27b	chr10.trna2463-SerAGA	tRF-3	27	1197.89	1339.73	875.992	730.347	548.896	1118.03	-1.42343	0.1959
rno-tiR5-Ser-32a	chr17.trna1587-SerAGA	tiRNA-5	32	750.551	895.021	746.006	563.464	406.06	727.341	-1.40869	0.1133
rno-tiR5-Ser-33b	chr17.trna3674-SerGCT	tiRNA-5	33	10689.9	9983.68	9458.83	8955.43	6807.12	6736.35	-1.33924	0.054
rno-tRF3-Ile-27a	chr17.trna1603-IleAAT	tRF-3	27	633.617	711.821	666.884	563.464	374.432	805.029	-1.1543	0.5478
rno-tRFi-Ser-21c	chr4.trna7087-SerGCT	i-tRF	21	0	0	0	361.892	425.445	254.457	348.265	0.02
rno-tRF3-Met-26a	chr17.trna1584-MetCAT	tRF-3	26	518.043	416.744	454.009	366.58	245.881	556.202	-1.18788	0.5082
rno-tRFi-Ser-21a	chr20.trna1886-SerTGA	i-tRF	21	217.551	0	241.133	420.02	407.081	242.072	2.32231	0.1064
rno-tRF3-Thr-27a	chr10.trna2464-ThrAGT	tRF-3	27	3196.64	4001.02	3204.43	2791.07	1684.44	3913.68	-1.23986	0.4
rno-tiR3-Arg-43b	chr10.trna5785-ArgCCG	tiRNA-3	43	326.326	236.341	276.926	309.39	205.071	397.448	1.08582	0.7222
rno-tRF3-Ala-27a	chr2.trna2176-AlaAGC	tRF-3	27	323.607	293.679	250.552	213.76	148.957	275.849	-1.35736	0.1628
rno-tRFi-Leu-21a	chr1.trna11063-LeuTAA	i-tRF	21	0	0	0	0	169.362	0	57.4539	0.505
rno-tRF3-Ser-44a	chr5.trna455-SerAGA	tRF-3	44	501.727	415.346	1064.38	1319.13	1633.42	729.593	1.85701	0.1697
rno-tRFi-Phe-33a	chr7.trna427-PheGAA	i-tRF	33	0	0	0	160.32	617.252	0	260.191	0.2961
rno-tiR3-Ser-49a	chr5.trna455-SerAGA	tiRNA-3	49	1405.92	1683.76	1326.23	1125.05	859.052	1851	-1.15133	0.5904
rno-tRF3-Trp-20a	chr10.trna2467-TrpCCA	tRF-3	20	229.788	190.192	291.997	327.203	328.521	275.849	1.30714	0.2
rno-tRFi-Gln-30b	chr17.trna3673-GlnCTG	i-tRF	30	1891.33	1818.01	1188.71	901.918	674.387	1120.28	-1.81548	0.0603
rno-tRFi-Gln-30a	chrX.trna146-GlnTTG	i-tRF	30	417.426	420.94	250.552	197.822	144.876	224.057	-1.91647	0.1
rno-tRF3-Ser-47a	chr5.trna455-SerAGA	tRF-3	47	2031.38	2313.07	2181.5	2091.66	1283.48	2936.38	-1.03396	0.8955
rno-tRF5-Gly-16a	chr13.trna2250-GlyTCC	tRF-5	16	169.962	176.207	0	0	0	0	-116.39	0.1836
rno-tRF3-Arg-27a	chr15.trna1072-ArgACG	tRF-3	27	599.625	917.397	940.043	838.165	467.275	1161.94	1.0042	0.9889
rno-tRF3-Ala-23a	chr2.trna2176-AlaAGC	tRF-3	23	0	187.395	145.057	0	0	0	-111.817	0.19
rno-tRFi-Lys-17a	chr17.trna719-LysCTT	i-tRF	17	0	0	163.895	0	0	162.132	-1.01068	1
rno-tRFi-Cys-18a	chr4.trna1767-CysGCA	i-tRF	18	155.005	0	0	0	0	0	-52.6683	0.505
rno-tRFi-Met-29c	chr17.trna3725-MetCAT	i-tRF	29	242.025	206.974	1126.54	1213.18	2037.44	642.897	2.46843	0.2061
rno-tRF3-Ala-19b	chr2.trna2176-AlaAGC	tRF-3	19	277.377	230.748	146.941	146.257	0	222.931	-1.7681	0.2917
rno-tRF3-Thr-30a	chr10.trna2464-ThrAGT	tRF-3	30	512.604	569.177	442.705	381.581	228.536	502.158	-1.36961	0.219
rno-tRF3-Thr-27b	chr14.trna5981-ThrCGT	tRF-3	27	0	188.793	180.85	0	0	173.391	-2.1126	0.3537
rno-tRFi-Cys-16b	chr4.trna1767-CysGCA	i-tRF	16	213.472	183.2	0	0	0	0	-133.224	0.1859
rno-tRF3-Arg-46a	chr1.trna4154-ArgTCG	tRF-3	46	171.321	174.809	154.476	165.008	0	225.183	-1.28082	0.6399
rno-tRFi-Ser-16a	chr17.trna3664-SerGCT	i-tRF	16	547.956	604.139	470.963	474.398	278.529	469.506	-1.32693	0.2
rno-tRFi-Cys-26a	chr4.trna1756-CysGCA	i-tRF	26	787.262	650.289	3615.11	4692.41	7026.48	2211.3	2.75595	0.1641
rno-tRF3-Gly-45a	chr10.trna705-GlyCCC	tRF-3	45	379.354	307.663	237.365	214.698	165.281	425.596	-1.14694	0.689
rno-tRF3-Thr-19c	chr14.trna5981-ThrCGT	tRF-3	19	0	167.816	0	0	0	0	-56.9388	0.505
rno-tRFi-Arg-38a	chr10.trna5785-ArgCCG	i-tRF	38	152.286	0	0	378.768	157.119	173.391	4.58689	0.0765
rno-tRF3-Ala-20a	chr2.trna2176-AlaAGC	tRF-3	20	248.824	184.598	0	0	0	157.628	-2.71697	0.3537
rno-tRFi-Cys-17a	chr4.trna1767-CysGCA	i-tRF	17	364.398	318.851	250.552	205.322	148.957	228.561	-1.59907	0.0508
rno-tRFi-Cys-31a	chr4.trna1756-CysGCA	i-tRF	31	1506.54	1164.93	1544.76	3713.61	2622.05	2006.38	1.97786	0.103
rno-tRFi-Ser-26a	chr17.trna3664-SerGCT	i-tRF	26	349.441	286.686	231.714	140.632	0	217.301	-2.41275	0.0982
rno-tRFi-Arg-32a	chr17.trna1585-ArgTCG	i-tRF	32	195.796	170.613	227.946	426.583	163.24	183.524	1.29964	0.556
rno-tRFi-Ser-18a	chr17.trna3664-SerGCT	i-tRF	18	282.816	274.1	278.81	315.953	244.86	347.908	1.08703	0.5084
rno-tRF3-Ser-44b	chr17.trna3956-SerGCT	tRF-3	44	810.377	820.902	972.068	969.421	932.51	1085.38	1.14732	0.141
rno-tRF3-Arg-35c	chr2.trna6815-ArgTCT	tRF-3	35	0	0	305.184	422.833	504.004	224.057	3.74417	0.184
rno-tRF3-Gln-20b	chr17.trna3717-GlnTTG	tRF-3	20	354.88	367.798	455.892	577.527	530.531	435.729	1.30909	0.0855
rno-tRF3-Trp-20b	chr10.trna11601-TrpCCA	tRF-3	20	0	0	0	138.757	0	0	47.2522	0.505
rno-tRF3-Cys-48a	chr4.trna1776-CysGCA	tRF-3	48	229.788	223.755	197.805	155.632	0	243.198	-1.62842	0.358
rno-tRFi-Pro-27a	chr1.trna4916-ProTGG	i-tRF	27	0	0	0	0	0	358.041	120.347	0.505
rno-tiR5-Pro-34a	chr10.trna464-ProCGG	tiRNA-5	34	993.936	721.611	642.394	538.151	282.61	923.25	-1.35142	0.4067
rno-tiR3-Arg-45a	chr1.trna4154-ArgTCG	tiRNA-3	45	265.14	300.671	263.739	235.324	0	362.544	-1.38558	0.5434
rno-tRFi-Ser-25a	chr17.trna3664-SerGCT	i-tRF	25	201.235	202.778	212.875	0	0	0	-206.629	0.0003
rno-tRF3-Ala-21a	chr2.trna2176-AlaAGC	tRF-3	21	277.377	239.138	182.734	158.445	0	220.679	-1.83775	0.2413
rno-tRF3-Thr-19a	chr15.trna915-ThrTGT	tRF-3	19	201.235	198.583	197.805	155.632	0	228.561	-1.55122	0.4019
rno-tRF3-Glu-26a	chr13.trna4006-GluCTC	tRF-3	26	161.803	232.146	224.178	189.384	0	247.701	-1.41138	0.5094
rno-tRFi-Gln-17a	chrX.trna146-GlnTTG	i-tRF	17	0	0	156.36	219.385	245.881	0	2.93842	0.3537
rno-tRFi-Met-48a	chr17.trna1584-MetCAT	i-tRF	48	0	0	276.926	399.394	663.164	197.035	4.51045	0.184
rno-tRF3-Arg-48a	chr10.trna5785-ArgCCG	tRF-3	48	0	0	0	0	160.18	0	54.3932	0.505
rno-tRFi-Met-21b	chr17.trna3952-MetCAT	i-tRF	21	0	0	0	186.571	216.293	0	135.288	0.1857
rno-tRF5-Arg-40a	chr17.trna1585-ArgTCG	tRF-5	40	280.097	226.552	857.153	1096.93	1284.5	472.884	2.09051	0.1955
rno-tRF3-Arg-35d	chr1.trna11062-ArgTCT	tRF-3	35	0	0	210.992	303.764	310.157	0	2.88292	0.3537
rno-tRFi-Arg-36a	chr17.trna1585-ArgTCG	i-tRF	36	402.469	289.483	1968.63	2298.86	3492.32	792.644	2.47292	0.2491
rno-tRFi-Glu-30a	chr9.trna932-GluTTC	i-tRF	30	0	0	742.238	890.667	1235.53	360.293	3.34052	0.184
rno-tRFi-Gly-17a	chr13.trna2250-GlyTCC	i-tRF	17	0	0	489.802	735.035	1064.12	320.886	4.30811	0.184
rno-tRFi-Arg-35a	chr10.trna5785-ArgCCG	i-tRF	35	0	0	146.941	227.823	300.974	0	3.54672	0.3537
rno-tRFi-Lys-31a	chr17.trna719-LysCTT	i-tRF	31	160.444	199.981	0	0	0	173.391	-2.06034	0.6428
rno-tRFi-Phe-40a	chr1.trna7480-PheGAA	i-tRF	40	254.263	281.093	203.456	150.945	0	200.413	-2.0934	0.1543
rno-tRF3-Gly-48a	chr10.trna705-GlyCCC	tRF-3	48	190.357	0	282.578	335.641	384.635	219.553	1.981	0.1987
rno-tRF3-Asn-19a	chr2.trna4360-AsnGTT	tRF-3	19	0	165.02	0	0	0	0	-56.0065	0.505
rno-tRF5-Met-43a	chr17.trna1584-MetCAT	tRF-5	43	416.066	504.848	406.912	314.077	167.321	443.61	-1.43407	0.2288
rno-tRF5-Ser-41a	chr7.trna9348-SerCGA	tRF-5	41	0	0	0	212.823	278.529	0	164.784	0.1907
rno-tRF1-Arg-49a	pre-chr2.trna6815-ArgTCT	tRF-1	49	233.867	197.184	165.779	201.572	0	251.079	-1.31643	0.5996
rno-tRFi-Arg-27b	chr1.trna4154-ArgTCG	i-tRF	27	163.163	156.629	0	0	0	0	-107.597	0.1837
rno-tiR3-Met-42c	chr17.trna3725-MetCAT	tiRNA-3	42	0	0	0	168.758	176.504	157.628	168.63	0.0011
rno-tRFi-Val-17a	chr1.trna7481-ValTAC	i-tRF	17	0	0	156.36	189.384	252.002	0	2.78857	0.3537
rno-tRF3-Gly-27a	chr2.trna7579-GlyCCC	tRF-3	27	303.212	300.671	197.805	174.383	153.038	283.73	-1.31024	0.2
rno-tRFi-Glu-16b	chr13.trna4006-GluCTC	i-tRF	16	254.263	212.567	237.365	258.762	197.929	217.301	-1.04461	0.6692
rno-tRF3-Arg-36e	chr2.trna9817-ArgACG	tRF-3	36	0	0	388.074	421.895	460.134	235.316	2.86479	0.184
rno-tRF3-Leu-35a	chr1.trna18389-LeuTAA	tRF-3	35	335.844	220.958	327.79	320.64	223.435	373.804	1.0375	0.8567
rno-tRF5-Gln-43a	chrM.trna4-GlnTTG	tRF-5	43	311.37	481.074	331.558	270.95	174.463	341.152	-1.42737	0.1945
rno-tRF3-Gln-45a	chrM.trna4-GlnTTG	tRF-3	45	641.775	692.243	501.105	527.838	349.946	874.835	-1.04699	0.8795
rno-tRFi-Ser-31a	chr17.trna3674-SerGCT	i-tRF	31	0	0	717.748	880.354	1396.72	361.419	3.66494	0.184
rno-tRFi-Arg-29a	chr13.trna2392-ArgTCT	i-tRF	29	0	0	0	0	192.828	0	65.2759	0.505
rno-tRFi-Tyr-17a	chr2.trna2175-TyrGTA	i-tRF	17	1445.35	2191.4	2334.09	1072.55	746.824	2815.91	-1.28794	0.5738
rno-tiR3-Gln-44a	chrM.trna4-GlnTTG	tiRNA-3	44	405.189	391.572	305.184	270.013	187.726	381.685	-1.31162	0.2634
rno-tRF3-Arg-35b	chr13.trna2392-ArgTCT	tRF-3	35	0	0	0	175.321	186.706	0	121.676	0.1839
rno-tRF1-Arg-44a	pre-chr2.trna6815-ArgTCT	tRF-1	44	225.709	0	0	0	0	149.747	-1.49731	1
rno-tRF1-Met-46a	pre-chr7.trna6637-MetCAT	tRF-1	46	0	0	180.85	0	0	0	-61.2833	0.505
rno-tRF3-Gln-20a	chrM.trna4-GlnTTG	tRF-3	20	182.199	160.824	258.088	408.769	517.268	227.435	1.91434	0.1508
rno-tRFi-Gln-32a	chrM.trna4-GlnTTG	i-tRF	32	248.824	151.035	1019.16	1122.24	1815.03	403.077	2.35112	0.2715
rno-tRFi-Met-29b	chr19.trna3057-MetCAT	i-tRF	29	507.166	534.216	2861.57	3070.46	4931.9	1517.73	2.4381	0.2
rno-tRFi-Gln-32b	chrX.trna146-GlnTTG	i-tRF	32	0	0	150.708	156.57	276.488	0	2.83692	0.3537
rno-tRF5-Val-23b	chr17.trna3927-ValCAC	tRF-5	23	0	0	152.592	180.946	211.192	0	2.53958	0.3537
rno-tRF3-Arg-27b	chr1.trna4154-ArgTCG	tRF-3	27	155.005	0	0	0	0	0	-52.6683	0.505
rno-tRF1-Val-18a	pre-chr2.trna4363-ValCAC	tRF-1	18	152.286	0	0	0	0	0	-51.7619	0.505
rno-tRFi-Arg-27a	chr17.trna1585-ArgTCG	i-tRF	27	178.12	194.387	0	0	0	0	-125.169	0.1843
rno-tRFi-Glu-32a	chr9.trna932-GluTTC	i-tRF	32	167.242	0	898.598	1067.86	1598.73	443.61	2.9127	0.1932
rno-tRFi-Phe-20a	chr1.trna7480-PheGAA	i-tRF	20	161.803	0	0	0	0	0	-54.9345	0.505
rno-tRF3-Ser-45a	chr17.trna3956-SerGCT	tRF-3	45	856.607	812.511	587.762	438.771	362.189	991.931	-1.25836	0.5297
rno-tRFi-Cys-33a	chr8.trna3639-CysGCA	i-tRF	33	0	0	307.068	487.523	601.949	198.161	4.16242	0.184
rno-tRFi-Met-29a	chr17.trna1866-MetCAT	i-tRF	29	0	0	0	0	149.977	0	50.9923	0.505
rno-tiR3-Met-42a	chr17.trna1866-MetCAT	tiRNA-3	42	0	0	143.173	167.82	207.111	0	2.58551	0.3537
rno-tRF5-Leu-25a	chrM.trna1-LeuTAA	tRF-5	25	371.196	317.453	271.275	206.26	162.22	383.937	-1.27469	0.4238
rno-tRFi-Pro-22a	chr1.trna4916-ProTGG	i-tRF	22	303.212	257.319	0	0	0	0	-187.843	0.1862
rno-tRF3-Gln-46a	chrM.trna4-GlnTTG	tRF-3	46	486.77	485.269	371.119	325.328	222.415	835.428	1.02972	0.7
rno-tRF5-Leu-17a	chrM.trna1-LeuTAA	tRF-5	17	630.898	681.055	2004.42	2779.82	3004.64	1310.56	2.13836	0.1465
rno-tRFi-SeC(e)-22a	chr1.trna2048-SeC(e)TCA	i-tRF	22	0	0	352.28	525.962	777.432	226.309	4.31407	0.184
rno-tRFi-Leu-25a	chr1.trna18389-LeuTAA	i-tRF	25	0	0	0	221.261	199.969	0	141.41	0.1845
rno-tRFi-Arg-16a	chr2.trna9817-ArgACG	i-tRF	16	190.357	187.395	0	0	0	0	-126.917	0.1967
rno-tiR3-Met-43a	chr17.trna1866-MetCAT	tiRNA-3	43	0	0	0	0	0	184.65	62.55	0.505
rno-tRF3-Leu-36a	chr1.trna18389-LeuTAA	tRF-3	36	1528.3	1071.23	1296.09	1176.62	890.68	1452.43	-1.1067	0.5825
rno-tRFi-Thr-35a	chr14.trna5981-ThrCGT	i-tRF	35	0	0	0	0	138.754	0	47.2514	0.505
rno-tRFi-Asp-34a	chr13.trna2243-AspGTC	i-tRF	34	437.821	374.79	222.295	0	158.139	493.15	-1.58631	0.4846
rno-tRF1-Ser-48a	pre-chr10.trna11261-SerGCT	tRF-1	48	159.084	0	0	0	0	0	-54.028	0.505
rno-tRFi-Ser-20a	chr17.trna3664-SerGCT	i-tRF	20	432.382	380.384	384.306	362.83	282.61	324.263	-1.23375	0.0627
rno-tiR5-Gly-35a	chr2.trna7579-GlyCCC	tiRNA-5	35	163.163	158.027	214.759	177.196	217.314	352.411	1.39145	0.3153
rno-tRFi-Phe-34a	chr7.trna427-PheGAA	i-tRF	34	187.638	0	0	0	0	307.375	1.62809	1
rno-tRF3-Arg-36b	chr17.trna1586-ArgTCG	tRF-3	36	0	0	173.314	218.448	252.002	0	2.68526	0.3537
rno-tRFi-Gly-22b	chr2.trna7579-GlyCCC	i-tRF	22	0	0	169.547	195.009	328.521	0	3.05152	0.3537
rno-tRFi-Leu-35a	chr1.trna12832-LeuTAG	i-tRF	35	425.584	507.645	440.822	284.076	138.754	288.234	-1.92847	0.0283
rno-tRF5-Glu-28a	chr4.trna7782-GluCTC	tRF-5	28	174.041	159.426	0	0	0	184.65	-1.79305	1
rno-tRF5-Gln-22a	chrM.trna4-GlnTTG	tRF-5	22	377.995	331.437	1288.56	1853.53	2107.84	859.073	2.41053	0.1313
rno-tRFi-Ile-20a	chr1.trna16068-IleTAT	i-tRF	20	167.242	0	0	0	0	0	-56.7474	0.505
rno-tRF5-Leu-24a	chrM.trna1-LeuTAA	tRF-5	24	493.569	388.775	310.836	249.387	188.747	305.123	-1.60291	0.0867
rno-tiR5-Gly-34a	chr2.trna7579-GlyCCC	tiRNA-5	34	250.184	269.905	241.133	181.884	0	264.59	-1.70026	0.3111
