# Supplementary material for: Integrative analysis of transcriptomes highlights potential functions of transfer-RNA-derived small RNAs in experimental intracerebral hemorrhage
Source: Aging (Albany NY). 2020 Nov 16;12(22):22794–813. doi: 10.18632/aging.103938 (PMC7746353; doi:10.18632/aging.103938)
Supplement: Supplementary Table 3 [file aging-12-103938-s004..xlsx]

## Sheet: Supplementary Table 2
Supplementary Table 2. The 826 differently expressed mRNAs after ICH (|log2 FC|>|log2 1.5|, P<0.05).
seqname	GeneSymbol	[Sham1](normalized)	[Sham2](normalized)	[Sham3](normalized)	[ICH1](normalized)	[ICH2](normalized)	[ICH3](normalized)	P-value	FDR	Fold Change	Regulation
NM_001191904	Nkx2-2	6.4806	6.01525	6.15538	6.75164	6.75983	6.74006	0.0180424	0.3371	1.44737	up
ENSRNOT00000064182	Slc38a11	5.88723	5.50772	5.60881	6.08067	5.97244	6.11941	0.0328595	0.388315	1.31002	up
NM_173304	Cyp2d5	8.10499	8.14474	7.97804	8.34102	8.49674	8.55922	0.00898019	0.290245	1.31015	up
ENSRNOT00000039400	Mzt1	6.72792	6.69314	6.66846	7.1418	6.97393	7.1099	0.00221979	0.243243	1.30018	up
NM_001107477	Zfp329	5.74375	5.59385	5.75641	6.93962	6.88079	7.14929	0.000182055	0.229909	2.44851	up
NM_024141	Duox2	5.3276	5.13009	5.35156	5.66473	5.44611	5.84641	0.0474627	0.421733	1.30375	up
NM_001134826	Sgcd	6.06257	6.28764	6.37606	6.69538	6.7807	6.67248	0.00870568	0.290245	1.38905	up
NM_022276	Gcnt1	7.15283	6.71176	6.68501	7.39185	7.63782	7.43617	0.019637	0.341397	1.55698	up
NM_012643	Ret	10.4684	10.3786	10.2384	10.9436	10.7139	10.7598	0.0102002	0.295381	1.36036	up
NM_001105832	Dlx3	3.57026	4.1548	3.97899	4.51037	4.59467	4.5757	0.0196951	0.341397	1.57888	up
NM_001033890	Rtfdc1	8.75497	9.20884	8.93841	9.70998	9.73284	9.45004	0.014295	0.31745	1.58397	up
NM_001000687	Olr456	3.59429	3.61795	3.13502	4.26635	3.94895	3.97105	0.0308304	0.3821	1.52946	up
NM_001170604	Il12rb1	3.93172	4.38111	4.34386	4.69568	4.62017	4.9209	0.0362714	0.396913	1.44062	up
ENSRNOT00000074820	LOC100362658	6.581	6.51095	6.54181	6.8521	6.97449	7.28229	0.0191857	0.340887	1.40611	up
NM_001107973	Exo5	9.00577	8.894	8.78484	9.30136	9.26455	9.29181	0.00378522	0.26308	1.31134	up
NM_001107558	Nkx6-2	11.2712	10.9232	10.9575	11.4969	11.3324	11.6215	0.0355535	0.396462	1.35001	up
NM_199496	Zbtb25	7.54258	7.06008	6.94151	7.69945	7.69568	7.85393	0.0409647	0.405451	1.48277	up
NM_001004415	Tacc2	3.7639	4.47922	4.15106	4.72397	4.64627	4.94185	0.0467206	0.419415	1.55758	up
ENSRNOT00000064717	Ighv13-1	4.04307	4.27602	4.44777	4.70753	4.79096	4.51178	0.044659	0.413217	1.33281	up
NM_001108508	Eps8l2	5.05802	4.86936	4.70563	5.41712	5.1928	5.21537	0.0329853	0.388315	1.31716	up
NM_001107246	Mfsd7	5.26434	5.646	5.5116	6.01301	5.98586	5.79104	0.0258429	0.370577	1.37173	up
NM_001039007	Hrasls5	5.5527	5.15435	5.23153	5.86931	5.91784	5.90077	0.00898037	0.290245	1.49808	up
ENSRNOT00000023018	Myo15a	4.85312	4.91501	5.10325	5.41837	5.23482	5.41648	0.0145182	0.318169	1.31898	up
NM_001108986	Pym1	4.02748	3.92715	4.20301	4.38671	4.4077	4.61308	0.0183129	0.3371	1.33479	up
NM_022686	Hist1h4b	3.30804	3.26522	3.43728	4.52618	4.0528	3.63548	0.0488467	0.42736	1.66398	up
NM_001123352	Abhd10	7.23899	7.10786	7.0314	7.4348	7.443	7.65259	0.0147943	0.318752	1.305	up
NM_001108180	Ky	4.45951	4.44316	4.27028	4.62115	5.00872	4.71991	0.0402433	0.403925	1.31246	up
ENSRNOT00000064835	AABR06009925.2	5.85585	5.73126	5.81673	6.23686	6.26128	6.37457	0.000952739	0.229909	1.40407	up
ENSRNOT00000056190	LOC102552199	4.48092	4.92832	4.89912	5.10984	5.37136	5.67529	0.0476209	0.422142	1.53266	up
ENSRNOT00000060347	Arap3	5.02771	4.43553	4.62312	5.23073	5.19554	5.36786	0.0355352	0.396457	1.48375	up
ENSRNOT00000036025	Celsr1	3.97723	4.28586	4.59153	4.82687	4.96428	5.2395	0.027889	0.373456	1.65329	up
NM_001106940	Lpar4	6.03159	5.51678	5.66138	6.21019	6.16155	6.16752	0.0451671	0.414874	1.35959	up
NM_001000426	Olr1124	4.84385	4.96696	4.88572	5.39574	5.48714	5.05441	0.038825	0.398946	1.33199	up
NM_001109311	RGD1563692	6.79537	7.06159	7.02182	7.31221	7.37786	7.49637	0.0116177	0.297981	1.35274	up
ENSRNOT00000037897	AABR06081622.1	5.00419	4.43728	4.57657	5.36786	5.39348	5.76702	0.017351	0.334931	1.78606	up
NM_012625	Pmch	12.9492	13.1636	12.9591	13.6981	13.4341	13.5576	0.00645342	0.277037	1.45328	up
ENSRNOT00000023805	Adam18	5.34383	5.42881	5.56093	5.71887	5.86566	6.19677	0.0356207	0.396612	1.39724	up
NM_001305280	Dpy19l4	5.12574	5.06389	5.06075	5.4613	5.54634	5.93102	0.0182489	0.3371	1.47709	up
NM_022215	Gpd1	6.81678	6.52769	6.48441	6.87277	7.34623	7.42871	0.0400082	0.403165	1.52233	up
NM_001136470	Usp49	5.57781	5.05664	4.90648	5.70565	5.80398	5.95248	0.0411903	0.405451	1.55875	up
NM_001039665	Sult2b1	4.18261	4.05587	4.32572	4.69707	4.76022	4.80537	0.0025297	0.245251	1.48057	up
NM_001277396	Apex2l1	5.67313	5.79482	5.62917	6.35785	6.09278	6.53011	0.010032	0.295082	1.54529	up
ENSRNOT00000039366	LOC100360821	4.79629	5.16627	5.20445	5.60056	5.4691	5.40292	0.0379043	0.397751	1.35209	up
ENSRNOT00000020793	Heatr3	6.55718	6.23198	6.34539	6.81568	6.69656	6.90644	0.0193172	0.341397	1.34541	up
NM_012618	S100a4	8.02895	7.9342	7.84888	8.08337	8.52204	8.4153	0.0469453	0.419852	1.32216	up
NM_001109262	Lexm	6.04079	5.81531	6.01804	6.21044	6.24792	6.5676	0.0457711	0.416308	1.3049	up
NM_013414	Bglap	5.87691	5.88791	5.80656	6.68441	6.47794	6.36936	0.00241989	0.245251	1.57291	up
NM_001191777	Odf3l2	3.66389	3.88201	3.84561	4.19237	4.37349	4.29315	0.00460311	0.266031	1.40364	up
NM_031086	Pros1	7.30318	6.99141	6.92902	7.36161	7.52182	7.58842	0.0359453	0.396913	1.3343	up
ENSRNOT00000005643	Smarce1l	5.955	5.63224	6.01638	6.20762	6.34773	6.62898	0.037456	0.397751	1.44083	up
NM_001024321	Hyal5	4.74681	5.06772	5.12589	5.27028	5.44532	5.67801	0.0439767	0.411595	1.399	up
NM_001105853	Recql5	9.64961	9.62132	9.79907	9.95353	9.97725	10.3102	0.0377513	0.397751	1.31068	up
NM_001108665	Mrpl50	10.0845	9.24246	9.58093	10.535	10.4705	10.5642	0.022684	0.360024	1.84962	up
ENSRNOT00000043852	AABR06090571.1	8.51786	8.2927	8.17295	8.61511	8.76728	8.80943	0.0262826	0.370577	1.32204	up
NM_198734	Yif1b	4.11413	3.85158	3.91259	4.76276	4.27568	4.48503	0.0275713	0.371677	1.46245	up
ENSRNOT00000067258	Frmd5	5.31473	5.46322	5.50611	5.87668	5.87935	6.0786	0.00428623	0.264736	1.43083	up
NM_001177819	LOC100362110	5.81673	5.83398	6.06155	6.34652	6.348	6.48305	0.00580654	0.27323	1.40293	up
NM_001244768	Fam110a	5.4426	5.57694	5.60619	5.72229	5.95353	6.13375	0.0379513	0.397751	1.31459	up
NM_001130098	Kdm1a	5.50389	6.09559	6.08416	6.89808	6.88776	7.0282	0.0064985	0.277037	2.06117	up
NM_001014107	Mospd1	5.86117	5.53417	5.52202	5.99136	6.19407	6.30051	0.0218412	0.356005	1.4368	up
NM_001001024	Olr95	4.55481	4.71917	5.01406	5.26273	5.12226	5.43314	0.0343368	0.392826	1.42408	up
NM_022230	Stc2	3.33757	3.93152	3.72227	4.38848	4.73277	5.37291	0.0256632	0.370577	2.24638	up
NM_139326	Pomc	5.32108	5.08646	5.46797	6.10212	5.6837	6.02525	0.0191593	0.340887	1.56395	up
ENSRNOT00000072438	LOC683422	9.48119	9.53627	9.40241	9.82409	9.9521	10.1998	0.0113652	0.297981	1.43267	up
NM_001106407	Cenpk	7.40301	7.38176	7.10741	7.75819	7.70275	7.88584	0.0114538	0.297981	1.39945	up
ENSRNOT00000073618	AABR06083068.2	5.36434	5.72827	5.72947	6.47408	6.1857	5.95313	0.0367911	0.397751	1.51251	up
NM_001108364	Mxd4	5.98706	6.11954	6.13419	6.4798	6.52644	6.64721	0.00233225	0.245251	1.38596	up
ENSRNOT00000051319	Atp11c	6.98604	7.19519	7.32756	7.4925	7.4983	7.68072	0.029627	0.37771	1.30819	up
NM_033231	Acsm3	4.1959	4.32019	4.22151	4.51216	5.25969	5.30555	0.0399242	0.40279	1.71705	up
NM_001001012	Olr1405	9.28211	8.66475	8.86054	9.47735	9.46487	9.76252	0.0375367	0.397751	1.55019	up
ENSRNOT00000060742	LOC680913	4.64336	4.70915	4.9187	5.0883	5.24516	5.20861	0.0114068	0.297981	1.34129	up
NM_013078	Otc	6.80059	6.65676	6.84854	7.31446	7.21257	7.92602	0.0358633	0.396913	1.6423	up
NM_001109068	Pm20d1	8.29827	8.22462	8.13132	8.55694	8.43816	8.84638	0.0386767	0.398946	1.31563	up
NM_053609	Bag6	5.06462	5.40374	5.48565	5.84698	5.87877	5.85417	0.0137664	0.313688	1.45596	up
NM_057203	Ccl22	4.40836	5.24175	5.06687	5.72005	5.74993	5.9347	0.0269387	0.370675	1.86077	up
NM_001108191	Ccrl2	7.20344	7.54118	7.58172	7.81307	7.81256	7.9014	0.0316472	0.385713	1.31972	up
NM_001126301	Tmc8	3.69544	3.79134	3.85198	4.50026	4.39925	4.45237	0.000242969	0.229909	1.59222	up
NM_001104633	Sema3d	6.43698	6.56593	6.26815	6.78558	6.80059	7.15147	0.0294652	0.37771	1.40334	up
NM_001271151	Cetn4	6.27807	5.89784	6.11418	6.47328	6.38162	6.57983	0.0371449	0.397751	1.30274	up
NM_001004086	Pon3	6.91452	6.64788	6.68405	6.98864	7.20569	7.44596	0.041007	0.405451	1.37995	up
NM_024402	Akap4	4.28714	4.23509	4.55186	4.67466	4.88125	4.98374	0.0217072	0.354082	1.40301	up
NM_001106915	Carf	4.05806	4.26673	4.5107	4.88198	4.928	5.28721	0.0146363	0.318752	1.68635	up
NM_001177817	LOC100362040	6.57807	6.75241	6.69187	7.15307	6.96983	7.11517	0.00587258	0.27323	1.32431	up
NM_001109499	Wbscr27	6.07456	5.84139	5.83066	6.53299	6.19936	6.5383	0.0209204	0.34949	1.42209	up
ENSRNOT00000074399	LOC100910259	5.58785	5.42345	5.32138	5.86235	5.85028	5.76135	0.0105428	0.297204	1.30173	up
NM_001025278	Pus10	7.23612	7.47099	7.26458	8.26535	7.74278	8.00926	0.0153727	0.321036	1.60425	up
NM_001109130	Tsnaxip1	4.44127	4.23076	4.30993	4.63839	4.98884	5.06462	0.0170634	0.333186	1.48448	up
NM_001191888	Prrg1	6.58273	6.27716	6.1324	6.89471	6.88928	6.80308	0.0174161	0.334931	1.44552	up
ENSRNOT00000025517	Klhdc7a	7.65065	8.02661	7.86174	8.28542	8.23659	8.45132	0.0195611	0.341397	1.39292	up
ENSRNOT00000074037	Noxred1	7.87314	8.11175	7.89407	8.42944	8.42183	8.5311	0.00396931	0.264649	1.41533	up
ENSRNOT00000060503	LOC689657	5.61189	5.90864	6.08243	6.29612	6.30704	6.45369	0.0296859	0.37771	1.39923	up
NM_001162408	Dusp13	6.76369	6.53891	6.41521	7.08646	6.94465	6.97584	0.0178149	0.336626	1.34696	up
NM_001107094	Hoxd10	4.53441	4.28148	4.45699	5.98159	5.09258	5.32608	0.0195825	0.341397	2.05973	up
NM_001107344	Mylip	10.1235	9.94515	9.94598	10.4485	10.4831	10.3196	0.00598512	0.27323	1.33073	up
NM_181692	Kiss1	5.17312	5.82167	5.5628	6.47511	6.02779	6.64376	0.0305492	0.380532	1.81885	up
ENSRNOT00000028440	Cgn	8.62213	8.59854	8.66317	8.93309	8.98729	9.18472	0.00665695	0.277037	1.326	up
NM_001105787	Mfsd6l	3.08336	3.31105	3.39739	4.61066	4.19121	4.41649	0.00172806	0.234537	2.20715	up
ENSRNOT00000060304	LOC100359587	7.34812	7.57808	7.32007	7.91339	7.82501	7.92401	0.00572277	0.27323	1.38708	up
NM_001109446	Uqcc1	10.431	10.2546	10.1988	10.7572	10.6376	10.7532	0.0062966	0.276828	1.33904	up
NM_001108710	Coch	5.76372	6.23316	6.00231	6.67093	6.47084	6.35905	0.0375135	0.397751	1.41475	up
ENSRNOT00000039924	AABR06082048.1	3.03569	3.9482	3.99206	4.84324	5.3314	4.9725	0.0156169	0.322477	2.62151	up
NM_001253859	Tom1l1	7.05447	7.05132	6.98325	7.62456	7.43092	7.44097	0.00220068	0.242348	1.38429	up
NM_001007692	Nfatc2ip	4.96193	5.05137	5.07688	5.49884	5.31604	5.54872	0.00575521	0.27323	1.34208	up
NM_001008377	RGD1307315	6.56489	6.23046	6.23032	6.61626	6.98137	6.74585	0.046668	0.419415	1.35592	up
ENSRNOT00000067996	RGD1560775	4.66673	4.55967	4.47495	5.67829	5.81947	5.73952	6.85666e-05	0.229909	2.26363	up
NM_001012198	Arhgap9	5.88671	5.61873	5.64975	6.07322	6.05921	6.16412	0.0138031	0.313688	1.30175	up
NM_013026	Sdc1	6.3568	6.39628	6.55025	6.68501	6.79537	6.95888	0.0187354	0.339091	1.30012	up
NM_001106692	Cela3b	7.4073	7.16057	7.05804	7.60003	7.73858	7.78099	0.0131644	0.310415	1.41215	up
NM_001107085	Cpn2	3.15705	4.10031	3.64091	4.78668	4.67869	4.33595	0.033548	0.390013	1.95569	up
ENSRNOT00000071040	Gm14597	9.23715	8.94461	9.0472	9.62556	9.61486	9.95412	0.00956687	0.294524	1.57483	up
NM_001107336	Dok3	6.38407	6.43933	6.42201	6.75504	7.42416	7.1391	0.0237632	0.36351	1.61436	up
NM_053998	Rab8a	9.50263	9.13891	9.17998	10.194	10.5259	10.5576	0.00214162	0.240875	2.22221	up
ENSRNOT00000036753	Aim1	6.17659	5.81591	6.06986	6.52706	6.40246	6.32188	0.0318051	0.38618	1.31617	up
NM_017037	Pmp22	7.17168	6.83645	6.82252	7.86947	7.30198	7.58064	0.032659	0.387962	1.55885	up
NM_022397	Hnrnpf	5.47651	5.63969	5.66257	5.95715	5.89838	6.20292	0.0179509	0.336732	1.34403	up
NM_001106530	Sun5	8.22489	8.143	7.93054	8.57156	8.45073	8.96237	0.0340114	0.391468	1.47639	up
ENSRNOT00000071312	AABR06091203.1	4.99619	4.8806	4.99716	5.33546	5.45624	5.71399	0.0100033	0.295082	1.45792	up
ENSRNOT00000064942	Tbc1d4	4.12616	3.84515	3.88711	4.30246	4.73212	4.75217	0.0197199	0.341397	1.56133	up
NM_053650	Pdlim3	4.99592	5.16806	5.33049	5.68592	5.83774	5.44053	0.0313747	0.384597	1.40435	up
NM_001108161	Cilp	4.74387	5.37205	5.423	5.85159	5.77223	5.86743	0.0418321	0.406203	1.57001	up
ENSRNOT00000060297	AABR06083163.3	7.34968	7.95704	7.6918	8.79689	8.44713	8.81126	0.00865389	0.290245	2.0264	up
NM_001000239	Olr303	8.30684	8.48461	8.48477	8.79182	8.81436	9.06933	0.0120408	0.302661	1.38169	up
NM_001106995	Nipal4	4.96997	5.31728	5.33767	5.55883	5.58401	5.72282	0.033295	0.389732	1.33199	up
ENSRNOT00000035839	Fbxl3-ps1	7.74308	8.14312	7.9875	8.54431	8.50953	8.49732	0.00885397	0.290245	1.4734	up
NM_001108157	Fem1b	8.91142	8.69822	8.66255	9.22694	9.13999	9.14654	0.00743326	0.287955	1.33215	up
ENSRNOT00000014360	Helt	4.9712	4.16003	4.17172	5.38696	5.16191	5.36641	0.0350724	0.395201	1.82865	up
NM_001135002	Clpsl2	5.32258	5.6468	5.3923	6.16112	5.97265	6.1524	0.00524177	0.273151	1.55995	up
NM_194461	Pigw	8.07138	7.88675	7.77733	8.34179	8.37491	8.27637	0.00981337	0.295082	1.33719	up
NM_001191108	Ice2	5.50966	5.66035	5.70357	5.91331	5.93785	6.26128	0.031021	0.382418	1.33141	up
NM_001001428	Olr1748	7.0311	7.1646	6.99092	7.34055	7.69481	7.64094	0.0152525	0.320316	1.41084	up
ENSRNOT00000047245	LOC690821	4.6661	4.26493	4.47676	5.03922	4.87392	5.13618	0.0169597	0.33317	1.46122	up
NM_001109436	Mogat2	7.51954	7.15147	7.1353	7.56768	7.78968	7.87159	0.0375872	0.397751	1.38916	up
ENSRNOT00000045660	Obox5	7.24413	7.59001	7.43532	7.85465	7.82479	7.88017	0.0132096	0.310415	1.34728	up
NM_001077666	RGD1308065	8.30958	8.21313	8.05193	8.5919	8.50358	8.71965	0.0134328	0.312654	1.33191	up
NM_001267054	Cdc26	4.89568	4.72558	4.79194	5.17426	5.2282	5.68256	0.0297994	0.37771	1.47149	up
NM_001191972	Evx1	6.79375	6.46783	6.51908	6.91452	7.04062	7.08996	0.0208117	0.348199	1.3393	up
NM_001047935	LOC498836	3.56672	3.75171	3.75691	4.23633	4.35076	5.12804	0.0374473	0.397751	1.84029	up
NM_019233	Ccl20	4.18694	4.52138	4.50654	4.88792	5.00354	5.06847	0.00865135	0.290245	1.49661	up
ENSRNOT00000075509	LOC100909671	4.87489	4.77342	4.9485	5.24045	5.74913	5.88154	0.0198588	0.342082	1.69127	up
NM_001014240	Akr1c13	2.94488	4.09219	3.8951	4.94687	4.85369	4.41619	0.0484983	0.424777	2.13593	up
ENSRNOT00000075595	Rictor	7.80149	7.29713	7.40264	7.97914	8.07813	8.22348	0.0247618	0.367184	1.50855	up
ENSRNOT00000066220	RGD1563780	6.22153	6.54989	6.16646	6.75331	6.98466	7.03	0.014327	0.31745	1.52629	up
NM_139185	Gng8	5.05323	4.75554	4.65988	5.1459	5.13225	5.34295	0.0482117	0.424187	1.30509	up
NM_001024348	LOC500567	4.38572	4.30621	4.84577	5.09773	5.07078	4.92906	0.0418755	0.406203	1.43392	up
ENSRNOT00000064561	Tex13b	3.46835	3.88057	4.00168	4.47962	4.15531	4.52785	0.0387746	0.398946	1.51999	up
ENSRNOT00000050620	Mov10l1	5.10898	4.88312	4.75171	5.39348	5.43986	5.15749	0.0378855	0.397751	1.33392	up
NM_133514	Mmp10	5.07546	5.33656	5.39883	5.55869	5.68036	5.94583	0.0388506	0.398946	1.37365	up
NM_080399	Ddit4l2	7.94038	7.36026	7.46853	8.61163	8.39911	8.59278	0.00772382	0.287955	1.9249	up
NM_001271152	Paqr9	5.87827	5.86703	5.86254	6.21586	6.1818	6.37798	0.00303856	0.248187	1.30973	up
NM_133591	Rph3al	9.67299	9.32085	9.35258	9.92395	9.69025	9.9456	0.043719	0.410479	1.3236	up
NM_001105847	Sppl2c	4.91671	4.57692	4.61921	5.11138	5.22585	5.24477	0.0129739	0.309065	1.40417	up
NM_017075	Acat1	11.5999	11.7522	11.6198	11.9534	12.1024	12.0629	0.00425776	0.264736	1.30338	up
NM_001109318	RGD1565785	6.73658	6.87049	6.81311	7.11927	7.45476	7.19335	0.014568	0.318169	1.36516	up
ENSRNOT00000024157	Tpbgl	5.03534	5.01101	5.20554	5.58401	5.4087	5.97934	0.0330848	0.388577	1.48802	up
NM_001108932	Tysnd1	7.11454	7.3956	7.27305	7.65751	7.64572	7.67747	0.00819023	0.28914	1.31875	up
NM_001127339	Tp63	4.74727	4.52506	4.70281	5.23331	5.21231	4.91501	0.0199573	0.342977	1.37729	up
ENSRNOT00000021919	Catsper4	6.37748	6.46855	6.54895	6.94045	6.83471	6.91053	0.00184199	0.238215	1.34745	up
NM_001134505	Eno4	7.43865	7.4184	7.24989	7.72484	7.64741	8.07306	0.0362332	0.396913	1.36238	up
NM_012548	Edn1	7.06261	6.98687	6.98673	7.40556	7.77208	7.30031	0.0296598	0.37771	1.3953	up
NM_001107792	Bpifa5	5.94641	6.34366	6.29195	6.63006	6.58642	6.61768	0.0291266	0.376741	1.3355	up
NM_001037209	Mterf4	8.81935	8.57778	8.54692	9.14074	9.01403	9.17257	0.00954209	0.294524	1.37659	up
NM_021266	Fzd1	7.75705	7.39221	7.37692	8.14675	7.94501	8.09685	0.0160228	0.325381	1.4683	up
NM_001000778	Olr1431	6.25026	6.17532	6.11259	6.55971	6.61202	6.80403	0.00472122	0.268539	1.39397	up
NM_001107934	Trim14	5.87615	5.49704	5.45758	6.07786	6.24124	6.16814	0.0175313	0.335218	1.46628	up
NM_001109565	Hils1	4.78394	4.2173	4.25693	4.92957	4.98743	5.40781	0.0437054	0.410479	1.61203	up
NM_001077674	Hlx	7.29993	6.65427	6.78953	7.46546	7.56737	7.58915	0.0353074	0.395565	1.54337	up
ENSRNOT00000036744	Micall2	7.2775	6.72722	6.7876	7.46156	7.50256	7.6822	0.0297725	0.37771	1.53474	up
ENSRNOT00000057854	Gm10874	5.48423	5.25465	5.26052	5.79167	5.74592	5.65197	0.00994533	0.295082	1.31651	up
NM_001127541	Cracr2b	2.57079	3.68571	3.57802	4.28826	4.36717	4.63807	0.0358088	0.396913	2.22375	up
NM_001033655	Dnah1	3.05619	4.03889	3.99865	4.90374	4.88926	4.71893	0.0251308	0.369466	2.20289	up
NM_001270666	Tnnt3	3.84561	4.05657	3.75305	4.45073	4.50066	4.2246	0.0148425	0.318752	1.42101	up
NM_001100662	Eif3c	13.6859	14.001	13.8873	14.273	14.2293	14.2998	0.0122951	0.304762	1.32802	up
NM_001105977	Efcab2	7.67605	7.51504	7.48257	8.00653	8.01021	8.10121	0.0020276	0.238809	1.39613	up
NM_001166403	RT1-T24-3	6.58575	6.06364	5.97551	6.85736	6.68368	6.94389	0.0391198	0.40018	1.53689	up
NM_001100645	Lrrcc1	8.14206	8.02339	7.92264	8.50795	8.51786	8.49212	0.00172187	0.234537	1.39147	up
ENSRNOT00000005584	Sybu	8.62459	8.3698	8.35072	8.71517	8.77849	8.99958	0.0361654	0.396913	1.30379	up
NM_031673	Capn10	11.4704	11.5661	11.4835	12.1082	11.8377	11.9271	0.00607134	0.274572	1.36696	up
NM_001009448	Cdh19	6.09264	5.91802	5.77757	6.13529	6.43044	6.40179	0.0398257	0.402779	1.31321	up
NM_053456	Plcl1	7.59837	7.42922	7.37938	7.83462	7.98632	7.96435	0.00486017	0.270982	1.37501	up
NM_001000101	Olr1644	5.32671	4.99232	5.15659	5.65483	5.37259	5.66094	0.0406223	0.404851	1.32339	up
NM_133621	Hopx	9.09126	8.87223	8.86602	9.2777	9.27737	9.47508	0.0156253	0.322477	1.3197	up
NM_024148	Apex1	8.88854	8.66427	8.60925	9.01257	9.17852	9.33131	0.0225331	0.359345	1.3693	up
NM_001025416	Dok1	7.71191	7.42064	7.36484	7.84511	7.94052	7.8985	0.0235652	0.362878	1.31547	up
NM_017009	Gfap	15.3386	15.1991	15.2829	15.4629	15.6917	15.8463	0.0293937	0.37771	1.31352	up
ENSRNOT00000026011	Ercc6l2	6.92179	6.87413	6.68228	7.11243	7.38488	7.21592	0.0189084	0.340522	1.33023	up
NM_019227	Itsn1	4.18876	4.02059	4.07383	4.7607	4.41034	4.87489	0.0166515	0.330763	1.50272	up
NM_001025012	Gin1	8.76615	8.60528	8.4939	8.86503	8.98551	9.16585	0.0311939	0.383796	1.30467	up
NM_001191921	Zfp286a	7.81644	7.65986	7.61291	8.11725	8.26001	8.23474	0.0025659	0.245251	1.42168	up
NM_001106911	Mfsd6	4.2173	3.87959	4.32428	5.20408	4.57283	4.75888	0.0376251	0.397751	1.63	up
NM_012523	Cd53	10.1903	9.9589	9.93541	10.227	10.4968	10.527	0.0361583	0.396913	1.30925	up
NM_001009599	Clp1	9.19949	8.96341	8.9492	9.49816	9.38927	9.41562	0.0105392	0.297204	1.31675	up
NM_001025287	Tipin	9.66601	9.39338	9.41775	9.83696	10.0618	10.1673	0.015435	0.321102	1.44354	up
NM_001012223	Bin2	10.5164	10.0799	10.2078	10.6315	10.833	10.8104	0.0273918	0.370838	1.40473	up
NM_001033701	Zeb2	10.0349	9.34752	9.49733	10.8316	11.1932	11.1897	0.0038754	0.264649	2.72249	up
NM_031349	Aplnr	6.4332	5.77266	5.90028	6.54926	7.29624	7.21541	0.0340721	0.391468	1.97921	up
ENSRNOT00000036442	Ccdc18	4.49354	4.53806	4.52278	5.21478	5.11319	5.28137	0.000172535	0.229909	1.60769	up
ENSRNOT00000068439	RGD1563780	5.06366	6.24738	5.7464	6.78646	6.8042	6.9594	0.0285419	0.374955	2.2411	up
NM_001107756	Nat10	5.45376	4.91948	5.18638	5.60693	5.61358	5.76341	0.0431512	0.409409	1.38969	up
NM_001270954	Rasd1	11.7014	11.387	11.4924	11.9939	11.7288	12.0344	0.0421551	0.406203	1.31232	up
NM_012816	Amacr	6.16954	5.50829	5.74849	6.32133	6.38807	6.66717	0.041974	0.406203	1.56926	up
NM_001109219	Tmem243	9.60322	9.1679	9.25652	9.71534	9.81479	9.81932	0.0324633	0.387962	1.35717	up
NM_031662	Camkk1	7.00375	6.74307	6.8216	7.51626	7.10445	7.22176	0.0426846	0.407889	1.34228	up
NM_147206	Cyp3a9	9.40891	9.10003	9.15522	9.58531	9.84056	9.66827	0.0170744	0.333186	1.39152	up
ENSRNOT00000056239	Tipinl1	8.91211	8.57688	8.62925	9.14734	9.33253	9.38487	0.010048	0.295082	1.4971	up
ENSRNOT00000068454	LOC691274	4.10514	5.18705	4.53475	6.32643	6.11725	6.40027	0.00681955	0.279936	3.1873	up
NM_001008560	Prss35	9.12206	8.89574	8.85835	9.62199	9.34284	9.62174	0.0101161	0.295381	1.48466	up
ENSRNOT00000012385	Cga	3.98733	3.13916	3.07733	7.81424	6.83286	7.00596	0.000824411	0.229909	14.0882	up
NM_001191603	Palb2	7.69327	7.28476	7.29237	7.87003	7.96128	8.01457	0.0205659	0.346708	1.43909	up
NM_172033	Plekhb1	13.8384	14.2396	14.0393	14.4957	14.3368	14.6287	0.0352997	0.395565	1.36414	up
NM_001107296	Ercc6	4.8725	5.0033	5.17038	5.48575	5.55416	5.5503	0.0044447	0.264736	1.42867	up
NM_001108940	Bhlhe22	12.0865	11.8469	11.8659	12.2482	12.3335	12.4284	0.0121808	0.303621	1.32284	up
NM_001100479	Ptpn4	7.9973	8.36888	8.07684	8.74252	8.86814	8.96669	0.00546455	0.27323	1.63744	up
NM_013153	Has2	6.43416	6.23807	6.177	6.8074	6.62329	6.7506	0.00940826	0.294333	1.36039	up
NM_001108634	Pole4	7.05778	7.38585	7.34412	7.7499	7.68629	7.62673	0.0175839	0.335535	1.34262	up
NM_001012087	March7	8.43753	8.36484	8.26284	8.70332	8.84187	8.98404	0.00695292	0.282391	1.40251	up
NM_001106950	Rap2c	8.51076	8.09067	8.19984	8.56689	8.63975	8.77522	0.0481396	0.424187	1.3136	up
NM_001011891	Nubp2	11.1265	10.9843	11.0228	11.4567	11.385	11.5375	0.00246313	0.245251	1.33347	up
NM_134461	Capn5	10.9456	10.5528	10.6961	11.1392	11.0583	11.2202	0.0302287	0.379316	1.32659	up
NM_172223	Pxmp4	9.04396	8.98471	8.87749	9.57771	9.52955	9.8604	0.00383214	0.26425	1.61011	up
NM_017166	Stmn1	2.41094	3.50719	3.2589	4.31738	4.37397	3.84515	0.0394786	0.401702	2.1732	up
NM_001115038	Sin3b	11.6441	11.6088	11.6004	11.9584	12.0644	12.036	0.000306181	0.229909	1.32119	up
ENSRNOT00000030559	Tstd3	12.5216	12.6426	12.5256	13.0901	12.9603	13.0667	0.0010738	0.229909	1.39068	up
NM_001127680	Erich1	8.96104	8.84607	8.76775	9.34002	9.17998	9.37176	0.00579321	0.27323	1.35563	up
NM_001197241	Rab11fip1	2.41094	2.91482	3.27909	4.25113	3.78275	3.85269	0.0197696	0.341397	2.13451	up
NM_012598	Lpl	10.271	9.9379	10.0216	10.3924	10.3722	10.6052	0.0382577	0.398759	1.30111	up
NM_131914	Cav2	9.36699	9.30344	9.23152	9.81321	9.77075	9.63148	0.00289803	0.245473	1.35457	up
NM_001108486	Lrrc28	9.35681	9.14686	9.05403	9.82206	9.48019	9.7336	0.022339	0.357645	1.40709	up
NM_145084	Retsat	12.4052	12.9204	12.6211	13.2174	13.1832	13.1742	0.022378	0.357645	1.45667	up
NM_001277210	Smim15	8.46675	8.34179	8.25554	8.72368	8.77758	8.72306	0.00376483	0.26308	1.30744	up
NM_012624	Pklr	4.22722	4.08032	4.22961	4.39014	4.66635	4.7054	0.0211354	0.350618	1.32708	up
NM_001100758	Mybpc1	7.28408	6.82094	6.67044	7.36314	7.54542	7.52908	0.0458495	0.416308	1.46821	up
NM_001108211	Ankrd23	5.8619	5.56667	5.38878	6.28359	6.28693	6.10212	0.0148664	0.318752	1.5352	up
NM_022591	Tep1	10.3768	10.0916	10.1275	10.448	10.6388	10.6752	0.0270735	0.370675	1.30919	up
NM_001013182	Hn1l	10.4232	10.3447	10.2657	10.8223	10.6758	10.756	0.00281468	0.245473	1.32577	up
NM_001037349	Bloc1s2	11.424	11.4754	11.3855	11.8826	11.8238	11.8822	0.000181841	0.229909	1.3515	up
NM_001106683	Mfsd2a	11.422	11.5134	11.3962	11.6978	11.9128	11.9521	0.00906647	0.290427	1.32903	up
NM_001108417	Cul2	8.83642	8.63097	8.61776	9.24604	9.13052	9.2777	0.00334838	0.253982	1.43698	up
NM_001109451	Ppp1r35	10.6968	10.4744	10.5725	10.9264	10.9672	11.0141	0.00495872	0.272093	1.3086	up
NM_001191752	Ccdc77	7.50534	8.78401	8.12938	9.1989	9.24785	9.34242	0.0390179	0.399658	2.17873	up
ENSRNOT00000000233	LOC100909835	10.0279	10.209	10.0343	10.4138	10.5255	10.6837	0.010134	0.295381	1.3666	up
ENSRNOT00000060396	LOC100360220	5.06882	4.94933	4.40931	5.82939	5.73501	6.05639	0.00898206	0.290245	2.09136	up
NM_001109492	B3galt2	7.48917	7.39474	7.28642	8.39889	7.67219	8.01073	0.0431033	0.409409	1.55526	up
NM_001111269	LOC689064	8.1152	7.07311	7.26112	9.4653	8.31802	9.29568	0.0324872	0.387962	2.91438	up
NM_031721	Htra1	9.38734	9.22881	9.13728	9.4621	9.64345	9.80259	0.0347905	0.394801	1.30577	up
NM_001008854	RT1-N2	7.20935	6.77692	6.78048	7.35561	7.5361	7.65427	0.0241231	0.364347	1.50846	up
NM_001008278	Cdkn2aipnl	9.38535	9.02768	9.03832	9.47762	9.60976	9.82473	0.0348215	0.394801	1.40145	up
NM_001191086	Ropn1l	7.56385	6.89967	6.91534	7.93268	7.62939	8.01635	0.041903	0.406203	1.6623	up
NM_031315	Acot1	7.76988	7.45675	7.30607	8.09742	8.1093	8.08371	0.0128176	0.308499	1.50099	up
NM_030832	Fabp7	11.6326	11.7663	11.6261	11.9516	12.4517	12.2213	0.0245024	0.365718	1.44714	up
ENSRNOT00000027842	Fen1	10.154	10.0427	9.96259	10.4971	10.4983	10.4724	0.0014792	0.231238	1.35303	up
NM_033650	Agrp	6.7298	7.01689	7.00564	7.89125	7.32421	7.54672	0.0242335	0.36513	1.59102	up
NM_001009673	Fastkd2	8.76128	8.61332	8.50077	9.28114	8.96599	9.23265	0.0123974	0.304893	1.44875	up
ENSRNOT00000030065	Tmem62	8.04829	7.95762	7.8392	8.17587	8.62505	8.36763	0.0371555	0.397751	1.35768	up
NM_017235	Hsd17b7	9.69417	9.29754	9.36501	9.83834	9.79726	9.86522	0.0371887	0.397751	1.30257	up
NM_019254	Adam10	6.57303	6.2446	6.43184	6.92179	6.84724	6.68323	0.0276062	0.371813	1.32036	up
NM_001077592	Rpl38	15.8463	15.666	15.7912	16.1465	16.13	16.2311	0.00290845	0.245473	1.32073	up
NM_053696	Rbm3	9.87434	9.83422	9.70176	10.0393	10.3209	10.3578	0.0183516	0.3371	1.35274	up
NM_001030038	Zfp518a	8.89063	8.59449	8.5649	9.39597	9.0435	9.2296	0.020683	0.346977	1.45365	up
NM_001009668	Etfa	11.3643	11.3219	11.4329	11.8162	11.8474	11.5974	0.011023	0.297981	1.3019	up
NM_001047942	LOC499541	7.25389	7.61139	7.63442	7.95905	7.83783	7.93009	0.033415	0.390013	1.32785	up
NM_001014005	Tcta	11.7299	11.4298	11.5652	11.9661	11.8878	12.0679	0.0169435	0.33317	1.31858	up
NM_001134531	Zfp949	5.06112	4.97108	5.00546	5.55142	5.38577	5.72109	0.00574447	0.27323	1.45418	up
NM_001109094	Etaa1	8.72798	8.59571	8.51214	9.02451	8.96059	9.1009	0.00508315	0.273096	1.33489	up
NM_001105712	Grm3	10.603	10.3049	10.3276	10.987	10.758	10.7392	0.0288136	0.374965	1.33448	up
NM_017091	Pcsk1	8.57528	8.34305	8.25234	8.85427	8.70906	8.75351	0.0222078	0.357645	1.3032	up
NM_001109192	Gstm6	9.39702	9.33874	9.29289	9.83776	9.71195	9.80575	0.000789661	0.229909	1.35874	up
NM_001134533	LOC301124	11.354	11.1009	11.1499	11.6747	11.5032	11.719	0.0133016	0.311897	1.34791	up
NM_022204	Exoc5	9.38047	9.3182	9.24726	9.67849	9.67849	9.75182	0.00104923	0.229909	1.30824	up
NM_001168524	Arhgap11a	6.14277	5.83981	5.94253	6.44891	6.55139	6.38965	0.00835312	0.289637	1.40277	up
NM_001044696	Lrrc34	6.37578	5.75022	5.81078	6.68986	6.65802	6.69578	0.02446	0.365657	1.62709	up
ENSRNOT00000073557	LOC100911874	7.45516	7.23501	7.20251	7.77615	7.6442	7.85714	0.0101662	0.295381	1.37707	up
NM_001270835	Dusp14	7.05873	6.94983	6.94011	7.42906	7.30385	7.64339	0.0109742	0.297981	1.39077	up
NM_012651	Slc4a1	4.45426	4.20759	4.18261	4.91801	5.28137	5.41712	0.0058445	0.27323	1.89739	up
ENSRNOT00000074764	AABR06016896.1	7.47099	7.64339	7.46757	7.78081	7.95528	8.0324	0.0137982	0.313688	1.31541	up
ENSRNOT00000072684	Pot1b	7.55242	7.11266	7.19553	8.33255	7.70569	8.18328	0.0275715	0.371677	1.72544	up
NM_021596	Dbil5	6.66132	6.1326	6.21891	7.04278	6.73348	6.86945	0.0433936	0.409976	1.45831	up
NM_057138	Cflar	7.49026	7.32297	7.42739	7.85011	7.7202	7.84952	0.00380824	0.263423	1.31319	up
NM_057186	Hadh	11.8928	11.7745	11.7636	12.1821	12.233	12.2274	0.000809917	0.229909	1.32308	up
NM_001013853	Hba-a1	9.61921	9.61812	9.61844	10.4399	9.98793	10.3674	0.00993376	0.295082	1.56534	up
NM_024155	Anxa4	9.58577	9.16233	9.22354	9.8216	9.68072	9.81906	0.0325396	0.387962	1.36596	up
NM_001109677	Zfp867	6.50236	6.10515	5.99366	6.76682	6.77108	6.82977	0.0194076	0.341397	1.50403	up
NM_001012194	Vrk1	9.00997	8.79455	8.75351	9.05157	9.34802	9.38085	0.0362687	0.396913	1.32635	up
NM_012935	Cryab	8.74419	8.82408	8.6558	9.31434	9.2532	9.37883	0.000694477	0.229909	1.48875	up
NM_001011956	Lcmt2	8.37105	8.34138	8.23686	8.74813	8.65889	8.93698	0.00708194	0.285535	1.38023	up
NM_012930	Cpt2	10.0988	9.8216	9.89685	10.314	10.2735	10.3871	0.0123849	0.304893	1.30658	up
NM_001106210	Rnaset2	12.0904	11.9155	12.0344	12.382	12.6618	12.3487	0.0157566	0.323134	1.36674	up
ENSRNOT00000020505	Cyp26b1	9.65364	9.62732	9.61355	10.1702	9.93154	10.0603	0.0037914	0.26308	1.34026	up
NM_001024979	Gpatch4	9.66316	9.65177	9.564	9.90685	10.207	10.2489	0.0116103	0.297981	1.40896	up
NM_001100750	Suclg2	11.8644	11.9603	11.8482	12.2274	12.3054	12.376	0.00174075	0.234537	1.33051	up
NM_001191674	Pld5	7.66234	7.75996	7.52182	8.07179	8.30559	8.28542	0.00491111	0.271348	1.4875	up
ENSRNOT00000074584	Rnf170	7.12302	7.05148	6.95174	7.45419	7.57686	7.51865	0.00147361	0.231238	1.38942	up
NM_053395	Smpx	7.30488	6.95029	7.11996	7.91358	7.4993	7.58089	0.0295996	0.37771	1.45351	up
NM_001003975	G4	11.0787	10.9211	10.9275	11.6714	11.357	11.6039	0.00636146	0.276828	1.48281	up
ENSRNOT00000071797	AABR06083015.1	4.47727	5.13034	4.35305	5.92794	5.8283	5.86903	0.00732838	0.287955	2.33195	up
NM_001025750	Plek	6.95272	6.56869	6.71614	7.07327	7.29469	7.20201	0.0262023	0.370577	1.3605	up
NM_001191068	Sgcb	7.58603	7.20288	7.46645	7.72034	7.82994	7.8485	0.0336881	0.390119	1.30237	up
NM_001014034	Qrsl1	10.3894	10.1952	10.2461	10.7191	10.6037	10.6701	0.00445993	0.264736	1.30805	up
NM_031327	Cyr61	7.61139	7.6283	7.41313	8.19984	7.88633	7.95554	0.016974	0.33317	1.37837	up
NM_012782	Bckdha	12.2323	12.0071	12.0637	12.6378	12.381	12.486	0.016421	0.329238	1.32003	up
NM_001024752	Snx15	10.3958	10.1691	10.1546	11.0031	10.5357	10.595	0.0471872	0.420996	1.38647	up
NM_001108827	Iba57	9.33042	9.04238	9.04949	9.49757	9.58895	9.57771	0.0139563	0.314331	1.33236	up
ENSRNOT00000048767	Mt-nd5	14.5368	14.8822	14.7297	15.1353	15.231	15.0694	0.0177474	0.336565	1.34628	up
NM_130409	Cfh	11.0455	10.8426	10.9044	11.2388	11.4784	11.2614	0.0152332	0.320215	1.31526	up
ENSRNOT00000003882	Huwe1	4.45775	4.46233	4.69227	4.8235	5.17038	4.99555	0.0222295	0.357645	1.37461	up
NM_001108627	Cul1	10.0309	9.98765	9.99116	10.3608	10.4365	10.4122	0.000108638	0.229909	1.31942	up
NM_001034938	Endog	9.11879	8.59364	8.71965	9.41004	9.25068	9.41899	0.0305119	0.380497	1.46328	up
NM_001105872	Meltf	7.3149	7.46694	7.10206	8.0706	7.55667	7.80508	0.0472444	0.420996	1.43014	up
NM_001107544	Dchs1	10.8876	10.7054	10.7258	11.2363	11.1473	11.2054	0.00259228	0.245251	1.34111	up
NM_001044228	Pes1	8.89843	8.6211	8.57449	9.20442	9.20369	9.19785	0.00757898	0.287955	1.41812	up
NM_001107983	Zmym1	9.46282	9.17562	9.18078	9.7253	9.68588	9.55548	0.0238896	0.363934	1.30358	up
NM_024129	Dcn	8.60119	8.27815	8.2709	8.82767	8.72742	9.15708	0.0371804	0.397751	1.4346	up
NM_001277391	Map10	6.77661	6.40777	6.46292	7.09647	6.92221	6.98045	0.0231067	0.361972	1.36662	up
ENSRNOT00000027704	Wdr11	6.97704	7.01775	7.07858	7.24929	7.54019	7.91448	0.0492828	0.429449	1.45754	up
ENSRNOT00000066990	AABR06082939.2	5.94834	6.52797	6.31769	6.8755	6.83351	6.75213	0.0326581	0.387962	1.4699	up
NM_001135992	LOC498276	10.4698	10.1962	10.1938	10.5088	10.748	10.7875	0.0353837	0.395565	1.31482	up
NM_133603	Kcne2	10.1707	9.38101	9.71277	10.3715	10.8021	10.5485	0.0348236	0.394801	1.76442	up
NM_012857	Lamp1	13.3514	13.3694	13.3551	13.7108	13.793	13.7384	9.60634e-05	0.229909	1.3093	up
NM_017194	Chrne	8.18705	7.92008	7.94078	8.56447	8.40791	8.54525	0.00774385	0.287955	1.40436	up
NM_001108706	Efcab10	8.02239	7.72938	7.73988	9.00997	8.4859	8.5039	0.013168	0.310415	1.78514	up
NM_031510	Idh1	9.1073	9.27625	9.08223	9.64196	9.59145	9.6022	0.00190451	0.238215	1.37231	up
NM_001109002	Smad6	6.07147	5.64228	5.54922	6.56014	6.40179	6.14691	0.0375526	0.397751	1.53187	up
NM_013166	Cntf	9.4744	9.28681	9.13319	9.58502	9.83834	9.6583	0.03324	0.389295	1.31563	up
ENSRNOT00000071007	AABR06047718.3	6.52129	6.19368	6.21823	6.81536	6.83714	6.59448	0.0286158	0.374965	1.35465	up
NM_001169128	Vsx2	6.43286	6.22018	6.0487	6.68754	6.80048	6.74548	0.0116069	0.297981	1.42463	up
NM_001135717	Rbm46	5.646	5.71116	5.3096	6.1102	6.0722	5.9745	0.0191553	0.340887	1.41099	up
ENSRNOT00000007048	AABR06049789.1	11.1183	11.1646	11.1567	11.6146	11.7395	11.2912	0.0402557	0.403925	1.32124	up
ENSRNOT00000064526	Glt1d1	5.77865	5.42801	5.48423	5.98586	5.86373	6.02173	0.0295809	0.37771	1.31356	up
NM_001002798	Top1mt	9.49297	9.07941	9.13025	9.7234	9.74256	9.54074	0.0402123	0.403925	1.35162	up
ENSRNOT00000004320	Lgals3bp	11.0588	10.84	10.875	11.2831	11.4397	11.4145	0.00551897	0.27323	1.37029	up
ENSRNOT00000046179	RGD1559955	13.0115	12.8018	12.9024	13.3382	13.3051	13.2475	0.00406431	0.264736	1.31192	up
NM_013087	Cd81	13.1248	13.251	13.1788	13.4971	13.751	13.5248	0.010058	0.295082	1.32511	up
NM_001107259	Peli2	10.3794	10.1235	10.1329	10.5278	10.7948	10.6083	0.0200017	0.343473	1.34878	up
NM_031798	Slc12a2	10.1304	9.96567	9.9771	10.5221	10.4689	10.4334	0.00158219	0.231238	1.36642	up
NM_147146	Rwdd1	9.19075	8.81912	8.82708	9.33455	9.37742	9.38401	0.0273581	0.370838	1.33763	up
NM_019385	Gorasp1	11.8583	11.6424	11.7457	12.2594	12.1761	12.2203	0.00215465	0.240875	1.38492	up
NM_001107004	Zfp39	8.07947	7.76791	7.81988	8.5513	8.55739	8.51683	0.00255869	0.245251	1.57217	up
NM_001107137	Tyw1	9.55903	9.03016	9.13936	9.79752	9.70809	9.70253	0.0397389	0.402454	1.40756	up
NM_019257	Srsf5	7.64192	7.35843	7.31992	7.72938	7.98535	7.90381	0.0267676	0.370675	1.34981	up
NM_001108089	Mettl25	8.59159	8.33255	8.28906	8.77046	8.91511	8.75523	0.0188814	0.340342	1.32795	up
NM_019187	Coq3	9.20852	8.89811	8.86149	9.42756	9.46325	9.4422	0.0146747	0.318752	1.37075	up
NM_198753	Rpl3	14.3134	14.2293	14.2785	14.5723	14.6795	14.7128	0.00146286	0.231238	1.30235	up
NM_001191933	Opn3	10.1363	10.0881	10.0199	10.7989	10.5943	10.6398	0.00107839	0.229909	1.51174	up
NM_001107258	Atg14	9.4354	9.24713	9.21902	9.77239	9.79011	9.65058	0.0056661	0.27323	1.35395	up
ENSRNOT00000045014	AABR06002048.1	13.7152	13.4158	13.5393	14.1023	14.0934	13.9568	0.00749065	0.287955	1.40843	up
NM_001077670	Eif3j	9.82293	9.47009	9.54144	9.85101	10.1158	10.0187	0.0444029	0.412468	1.30468	up
NM_001024925	Gpr34	9.33108	9.13999	9.04588	9.56818	9.8216	9.81419	0.008923	0.290245	1.47666	up
NM_133609	Eif2b3	8.59619	8.25027	8.23915	8.92302	8.86124	9.02976	0.0105596	0.297204	1.49085	up
NM_017068	Lamp2	10.9185	10.4456	10.6039	11.1627	11.0534	11.1404	0.0317264	0.385713	1.37823	up
NM_001107153	Usp30	11.4864	11.4611	11.4563	11.8672	11.9898	11.8558	0.000575614	0.229909	1.35315	up
NM_053850	Blvra	11.4788	11.1194	11.2398	12.0333	11.8172	11.9708	0.00588949	0.27323	1.5813	up
ENSRNOT00000074218	RGD1563780	6.22053	6.37328	6.01219	6.82269	6.81793	6.88619	0.00391269	0.264649	1.55862	up
ENSRNOT00000007430	Hrsp12	10.4801	10.2497	10.2246	10.75	10.8476	10.7539	0.00596253	0.27323	1.38097	up
NM_001199168	Acyp1	8.15454	7.79923	7.81467	8.38166	8.26535	8.36017	0.0271956	0.370675	1.33137	up
NM_001191693	Arhgap21	13.1562	13.2653	13.1841	13.5628	13.7108	13.6129	0.00142448	0.231238	1.3444	up
ENSRNOT00000036265	AABR06023289.1	13.7419	13.5216	13.6366	14.0456	14.0859	14.04	0.00289782	0.245473	1.34142	up
NM_001106840	Gsta4	10.6712	10.8404	10.7274	11.0328	11.1336	11.2669	0.00906838	0.290427	1.31776	up
NM_001271105	Aldh7a1	8.53427	8.33296	8.30293	8.73558	8.80386	8.96341	0.0109885	0.297981	1.36059	up
ENSRNOT00000060420	AABR06083053.2	3.57638	4.48018	3.45771	6.35599	5.67078	5.807	0.00542109	0.27323	4.30645	up
NM_053936	Lpar1	13.0184	13.1592	13.084	13.412	13.5345	13.51	0.00196562	0.238809	1.31796	up
NM_001011912	Polm	9.41899	8.98605	9.08553	9.6165	9.6003	9.76215	0.0242999	0.365219	1.41042	up
NM_001013082	Pon2	12.422	12.3769	12.4095	12.745	12.851	12.7479	0.00053437	0.229909	1.3	up
NM_001107060	Polg2	7.97804	7.57608	7.5321	8.19113	8.19933	8.16588	0.0261703	0.370577	1.40449	up
NM_001107080	Dgcr6	13.4042	13.1164	13.2475	13.6244	13.5757	13.7251	0.0148728	0.318752	1.3065	up
NM_001007601	Pcbd1	11.3318	10.944	11.0387	11.5413	11.555	11.704	0.0179332	0.336732	1.40957	up
NM_031851	Phb	8.87011	8.4254	8.60107	9.1668	8.91769	9.17998	0.042258	0.406203	1.37169	up
NM_001191610	Tmem60	8.42626	7.97363	8.06171	8.65233	8.52225	8.54781	0.0434393	0.409976	1.33817	up
NM_198776	Hbb-b1	9.287	9.29804	9.18177	10.6429	10.0895	10.623	0.00294557	0.246038	2.29138	up
NM_019232	Sgk1	9.63364	9.26493	9.1402	8.67353	8.59788	8.95262	0.0299049	0.378255	1.52088	down
ENSRNOT00000018751	Nr6a1	5.82576	5.6482	5.262	5.08802	5.15193	4.78369	0.0472167	0.420996	1.48532	down
ENSRNOT00000042587	Adam24	5.53027	5.39214	4.88251	4.52885	4.68997	4.46701	0.0273317	0.370838	1.63169	down
NM_001164304	Plec	9.3105	9.51343	9.56201	8.97517	8.86264	9.08869	0.00853036	0.290162	1.40103	down
NM_001108828	Rnf222	6.14807	6.09755	6.04654	5.41012	5.41759	5.56565	0.000414382	0.229909	1.55071	down
ENSRNOT00000031509	LOC500445	8.79182	9.0757	9.14591	8.41489	8.41431	8.67703	0.0225568	0.359463	1.41657	down
NM_001000368	Olr754	5.59531	5.74819	5.73759	5.04802	5.25916	5.10455	0.0022525	0.245251	1.47065	down
NM_012868	Npr3	6.5516	7.09332	6.85867	6.23674	6.15577	6.33221	0.0228546	0.36109	1.50833	down
NM_001106667	Ifna4	8.10732	8.40077	8.37118	7.55612	7.68122	7.97883	0.0238476	0.363545	1.46852	down
ENSRNOT00000057802	Relb	5.17396	4.9042	4.87404	4.32019	4.35389	4.38798	0.00293474	0.246038	1.54761	down
ENSRNOT00000066559	Gm9733	4.54089	5.20258	5.10129	4.29315	3.91424	3.371	0.0321158	0.386213	2.12696	down
NM_001135046	Arpp21	12.7925	13.3075	13.042	12.4015	12.5584	12.3778	0.01945	0.341397	1.51724	down
ENSRNOT00000041067	Pitpnm3	7.73654	7.98242	7.92845	7.38219	7.20236	7.56058	0.0171454	0.333303	1.41496	down
NM_001108829	Kdm6b	13.3865	13.1094	13.1851	12.6724	12.7726	12.8355	0.00807436	0.287955	1.38203	down
NM_001137644	Tnfrsf25	7.1391	7.05406	6.95762	6.49253	6.65647	6.83003	0.0242315	0.36513	1.31092	down
NM_001107030	Fndc8	8.30772	8.40255	8.50007	8.00353	7.9442	7.95639	0.00172933	0.234537	1.35229	down
NM_001105960	Swt1	9.92338	9.62834	9.57771	9.27476	9.31268	9.33801	0.0213811	0.351923	1.32072	down
ENSRNOT00000071798	LOC680367	5.45143	5.95119	5.93235	4.6891	5.17795	5.20901	0.0326502	0.387962	1.68526	down
ENSRNOT00000011368	Gpr25	6.61562	6.85509	6.96217	6.32001	6.37766	6.57853	0.0403612	0.404336	1.30637	down
ENSRNOT00000000475	Fam184a	6.32913	6.0793	6.15458	5.68963	5.54031	5.87147	0.0157835	0.323134	1.40172	down
NM_001134579	RGD1309170	7.06275	6.93159	6.89471	6.37928	6.53073	6.80287	0.0429981	0.408758	1.31226	down
NM_153733	Serpinb10	12.1389	12.494	12.465	11.7833	11.6771	11.8772	0.010057	0.295082	1.5019	down
NM_017191	Adra1a	13.6999	14.0766	13.9874	13.2156	13.4329	13.4475	0.0150565	0.319816	1.47019	down
NM_001191789	Lrrk2	9.14747	9.23633	8.94399	8.7123	8.82094	8.60634	0.0204423	0.34627	1.31592	down
ENSRNOT00000065104	Bpifa6	7.79418	7.7308	7.28192	6.89499	6.8448	6.8426	0.0102352	0.295381	1.67192	down
NM_053294	Adora2a	11.177	11.531	11.3484	10.5334	10.8631	10.6551	0.00890153	0.290245	1.58915	down
ENSRNOT00000037665	Cd109	10.7183	10.5881	10.6312	10.0046	10.0501	10.3434	0.0104412	0.297065	1.4272	down
NM_199486	Pcdha11	9.53298	9.35703	9.31908	8.96742	9.01146	9.0746	0.00614245	0.276348	1.30604	down
NM_001108242	Slc9a7	11.1671	11.2063	11.1079	10.661	10.6566	10.8725	0.00496724	0.272093	1.34764	down
NM_001013928	LOC297756	6.58436	6.51173	6.86415	5.88997	5.90614	6.36905	0.0347013	0.394362	1.514	down
NM_001108853	Piwil1	5.99252	5.52725	6.1423	5.10641	5.22486	5.34504	0.0285612	0.374955	1.58219	down
ENSRNOT00000074855	Nwd1	10.3603	10.7316	10.7183	10.2963	10.1192	9.98444	0.0360778	0.396913	1.38522	down
NM_053798	Sacm1l	9.79696	9.8489	9.7478	9.37529	9.41829	9.36443	0.000251399	0.229909	1.33042	down
NM_019224	Rgs9	10.0838	10.5088	10.1481	8.42978	9.41743	9.12936	0.017537	0.335218	2.38615	down
NM_001107338	Zfp346	9.6372	9.51658	9.60418	8.88	9.22881	9.18631	0.0135049	0.312883	1.40212	down
NM_001271244	Rbpms	8.33719	8.12763	8.02098	7.81701	7.74182	7.69345	0.0145124	0.318169	1.32976	down
NM_138521	Ppp1r1b	8.20259	8.1695	8.08176	7.32608	7.66973	7.79682	0.0188595	0.340224	1.46789	down
NM_001108922	Stk32c	12.7415	12.9607	12.8351	12.5055	12.3733	12.4609	0.00583589	0.27323	1.3188	down
ENSRNOT00000015387	Tiparp	8.68849	8.21219	8.24062	7.88751	7.95004	7.83527	0.0361338	0.396913	1.40395	down
NM_053713	Klf4	10.4991	10.5126	10.3921	9.9321	10.0196	9.887	0.000663779	0.229909	1.43568	down
ENSRNOT00000040187	Pcdh10	10.9303	10.6743	10.8312	10.1733	10.2913	10.5645	0.0271788	0.370675	1.38406	down
NM_001000016	Olr1439	10.7948	10.317	10.3759	9.87504	9.96285	10.0282	0.0261315	0.370577	1.45449	down
NM_001000348	Olr668	5.29839	5.52988	5.46639	4.84652	4.90784	5.09192	0.00878291	0.290245	1.39745	down
NM_212504	Hspa1b	12.379	11.6779	11.9539	10.1896	8.93562	9.82323	0.00516942	0.273151	5.11285	down
NM_053367	Dhh	7.4993	7.50363	7.29166	7.01228	6.95655	7.17502	0.0161071	0.325726	1.30457	down
NM_001008935	Vom1r61	6.03215	5.76603	5.94285	5.28684	5.27087	4.9501	0.00523691	0.273151	1.67528	down
NM_001013177	Sult1c2a	6.29789	6.54796	6.58795	6.00817	5.845	5.82208	0.00559353	0.27323	1.50127	down
ENSRNOT00000011832	RGD1304963	9.33305	9.26251	9.16285	8.83132	9.02274	8.76472	0.014373	0.317655	1.30123	down
ENSRNOT00000032719	Usp37	7.6488	7.4945	7.67331	7.2575	7.21239	7.06969	0.00589471	0.27323	1.3432	down
NM_001109261	Pax5	6.86813	6.82482	6.48853	6.39283	6.26842	6.38393	0.0401531	0.403812	1.30023	down
ENSRNOT00000072325	AABR06031675.2	7.59245	7.17051	7.1646	6.73453	6.7346	6.71121	0.0147846	0.318752	1.49734	down
NM_013001	Pax6	4.46141	4.1545	4.18535	4.02748	3.90914	3.72749	0.0442912	0.412468	1.30048	down
NM_001001275	Olr373	8.14312	7.86976	7.90009	7.41414	7.49325	6.99568	0.0193353	0.341397	1.59104	down
NM_022189	Htr3b	6.3175	6.58359	6.62209	5.89935	5.96495	5.79324	0.00451806	0.265029	1.53888	down
NM_001108588	Slc5a12	5.33709	4.60878	4.69473	4.12896	3.6743	3.01393	0.0325741	0.387962	2.4191	down
NM_001012464	Terf1	9.45065	9.69025	9.69859	9.21527	9.30638	9.14153	0.0141379	0.316977	1.31231	down
ENSRNOT00000073133	Trav7-2	10.0219	10.0155	10.0424	9.30796	9.34242	8.97734	0.00218454	0.241946	1.7622	down
ENSRNOT00000018163	Crisp3	7.70224	7.88858	7.80995	7.39474	7.42979	7.23823	0.00505134	0.272093	1.36226	down
NM_001001285	Olr131	6.30797	6.62209	6.55934	6.01638	6.02869	5.52156	0.0291855	0.376741	1.55933	down
NM_001000017	Olr1440	9.76437	9.99306	9.9021	9.39781	9.42526	8.71114	0.0433767	0.409976	1.63404	down
NM_001000119	Olr23	7.39926	7.20935	7.25111	6.71486	6.74718	6.2535	0.013524	0.312883	1.64117	down
ENSRNOT00000073630	AABR06047878.1	8.16194	8.51419	8.00276	7.58145	7.6495	7.26132	0.0194131	0.341397	1.65735	down
NM_001000713	Olr1523	9.43689	9.35852	9.42795	8.97284	9.05727	8.59594	0.0208634	0.348801	1.44637	down
NM_001000200	Olr221	7.47614	7.7202	7.61493	7.2762	7.25111	6.83601	0.0387682	0.398946	1.39731	down
NM_198780	Pck1	5.16898	5.0003	4.95466	4.43455	4.7031	4.35542	0.011761	0.299574	1.45763	down
NM_001105889	Tmem30c	8.91737	8.60364	8.93013	7.91597	8.00876	7.33297	0.010881	0.297981	2.09142	down
ENSRNOT00000030996	LOC100911302	12.0685	12.0498	12.103	11.6286	11.6265	11.1204	0.0222657	0.357645	1.53184	down
NM_001106146	Pudp	4.60267	5.06075	4.9563	4.44751	4.23889	4.48329	0.0378142	0.397751	1.39798	down
ENSRNOT00000074580	Zfp383	8.89622	8.79083	8.78462	8.26788	8.43899	8.14474	0.00432254	0.264736	1.45399	down
NM_001009506	Vom1r20	6.89258	7.54019	7.59909	6.27411	6.55196	6.35892	0.0169465	0.33317	1.93048	down
NM_001000984	Olr1164	5.06716	5.47469	5.45639	4.96378	4.34814	4.06816	0.0420503	0.406203	1.83112	down
NM_001000528	Olr1509	7.81339	8.1225	7.98242	7.45445	7.55847	6.89607	0.0404652	0.404496	1.59082	down
NM_001034944	Grap2	5.42614	5.33411	5.16785	4.88493	5.03459	4.69349	0.0243205	0.365219	1.35507	down
NM_001191085	Mical3	4.82181	5.35398	5.18787	4.24204	4.28174	3.12704	0.0391632	0.40022	2.35807	down
ENSRNOT00000067344	LOC684170	6.71188	6.19936	6.11604	5.89701	5.6915	5.62579	0.0411032	0.405451	1.52027	down
ENSRNOT00000074220	AABR06091214.1	8.89239	9.02525	8.94728	8.58241	8.41198	7.96641	0.027721	0.372333	1.55262	down
NM_022523	Cd151	7.08629	7.16953	7.11726	6.73938	6.86587	6.46692	0.0225973	0.359592	1.35064	down
NM_001000935	Olr36	5.64936	6.33424	6.10687	5.35716	5.2705	5.36954	0.0266836	0.370675	1.62198	down
NM_001136241	Ngef	13.5988	13.8844	13.6084	13.2563	13.1725	13.3115	0.0115414	0.297981	1.36646	down
ENSRNOT00000065987	LOC100910068	11.7903	12.2234	12.1606	11.5683	11.6553	11.6987	0.0410792	0.405451	1.33547	down
ENSRNOT00000035706	AABR06033829.1	10.7736	10.066	10.3307	9.73948	9.80575	9.86767	0.049129	0.428692	1.50087	down
NM_001047893	Shroom2	10.1507	9.85892	9.95725	9.48433	9.49557	9.05847	0.0184802	0.337255	1.56139	down
NM_001105826	Tubd1	6.71955	6.83324	7.05551	6.50364	6.34125	6.55851	0.0273795	0.370838	1.32101	down
ENSRNOT00000057508	ENSRNOG00000045982	7.7186	7.92602	7.91928	7.4935	7.48356	7.02003	0.037458	0.397751	1.43621	down
NM_001001366	Olr1029	5.87303	6.21469	6.00418	5.52366	5.39883	4.93053	0.0223525	0.357645	1.67748	down
ENSRNOT00000035013	RGD1565682	8.09009	7.39092	7.73873	7.0672	7.01213	6.88761	0.0227978	0.360707	1.68289	down
NM_001108912	Ffar3	7.69115	8.10994	7.94247	7.45531	7.38816	7.0027	0.0273919	0.370838	1.55021	down
NM_001309449	Tagap	6.33636	5.6827	5.88044	5.23989	5.28578	5.39734	0.0296821	0.37771	1.57881	down
ENSRNOT00000068594	Zfhx3	9.25595	9.34265	9.23583	8.92209	8.98845	8.73828	0.00841188	0.289637	1.31513	down
ENSRNOT00000064251	Msrb3	8.37852	8.44739	8.36017	7.96958	8.11435	7.55639	0.038249	0.398759	1.42924	down
NM_001108757	Pate4	5.97644	5.97843	5.93933	5.51785	5.0113	5.6635	0.0457561	0.416308	1.48163	down
NM_001001281	Olr75	4.53125	4.8497	4.58336	3.88377	3.81833	3.10086	0.0173858	0.334931	2.07597	down
ENSRNOT00000029719	Nfkbid	6.05944	6.43044	6.17716	5.82282	5.85611	5.67242	0.0235786	0.362878	1.35525	down
ENSRNOT00000045829	AABR06076118.1	6.01912	5.38363	5.53597	5.0602	4.18261	3.87614	0.0342601	0.392316	2.41706	down
ENSRNOT00000014730	Olr97	6.34605	5.77305	6.26648	5.53639	5.26734	4.9721	0.0229345	0.36157	1.82756	down
NM_017144	Tnni3	8.89025	9.03203	8.88194	8.17838	8.56385	8.54164	0.0194546	0.341397	1.42088	down
ENSRNOT00000033672	Crhr2	8.95796	8.52131	8.76095	8.16588	8.21268	7.76561	0.0212217	0.350902	1.62302	down
ENSRNOT00000040311	Arhgap6	9.44535	9.1382	9.27232	8.81912	8.83963	8.78747	0.00647124	0.277037	1.385	down
ENSRNOT00000023607	Gse1	10.6927	10.8292	10.7411	10.1123	10.2862	10.2158	0.00103482	0.229909	1.46366	down
NM_001277262	Tnnt1	7.76752	7.16205	7.35432	6.77266	6.83514	6.74377	0.0234677	0.362635	1.56277	down
NM_001106747	Nek9	6.90176	6.89066	6.83324	6.5011	6.64447	6.31024	0.0170385	0.33317	1.31035	down
NM_001106553	Alx4	9.8815	9.79011	9.81419	9.35879	9.4635	9.03863	0.014326	0.31745	1.45561	down
ENSRNOT00000066944	Zfp335	5.93802	5.65423	5.77438	5.47287	5.43221	5.27389	0.0179454	0.336732	1.31575	down
NM_001134515	RGD1566226	6.36513	6.65277	6.83645	6.15832	5.85666	5.75429	0.0191649	0.340887	1.61892	down
NM_001001098	Olr1515	7.85302	8.21112	8.12983	7.51583	7.47388	6.66809	0.0462864	0.417842	1.79675	down
ENSRNOT00000071907	LOC100909867	6.42178	5.95969	6.02801	5.77847	5.63028	5.60056	0.0388701	0.398946	1.38196	down
NM_001109069	Mfsd4	7.07294	7.30755	7.29084	6.84692	6.80403	6.63998	0.00948314	0.294524	1.37567	down
NM_001000519	Olr1307	7.10239	7.46126	7.32625	6.77578	6.81404	6.31041	0.0262777	0.370577	1.58362	down
ENSRNOT00000067571	Tex9	9.03463	9.20463	9.48892	8.27583	8.24209	8.47353	0.00377695	0.26308	1.88197	down
NM_001082477	Igf1	4.53597	4.50654	4.16276	3.98324	4.05	3.9971	0.0321884	0.386384	1.31189	down
NM_001025032	Cd96	5.10508	5.88718	5.65483	4.84299	4.97091	4.37774	0.0494683	0.430079	1.76355	down
ENSRNOT00000002988	AABR06078960.1	9.72139	9.41654	9.51678	8.69571	8.78462	8.48792	0.00204631	0.239656	1.86023	down
NM_001106338	Ms4a7	8.46116	8.09767	8.1152	7.58687	7.72808	7.63967	0.0102331	0.295381	1.48776	down
ENSRNOT00000015238	Usp50	7.27769	7.37786	7.25687	6.62171	6.66461	6.55401	0.000150662	0.229909	1.61406	down
ENSRNOT00000073052	1700092M07Rik	5.75686	5.94253	5.95267	5.53956	5.64397	5.27251	0.0353831	0.395565	1.3183	down
NM_001107034	Tbx4	8.46239	8.72127	8.71601	8.20375	8.22907	8.2198	0.00835356	0.289637	1.33393	down
ENSRNOT00000054944	Aspscr1	12.091	11.6943	11.8551	11.3936	11.4822	11.1107	0.0265196	0.370675	1.46542	down
NM_001008948	Vom1r98	5.13416	5.77456	5.66527	4.70238	4.58269	4.14551	0.0157954	0.323134	2.06738	down
NM_176074	C6	6.41025	6.28042	6.29219	5.8593	5.95042	5.82812	0.0012636	0.231238	1.36447	down
NM_022260	Casp7	8.0557	8.21829	8.16869	7.69131	7.54367	7.32079	0.00595569	0.27323	1.54646	down
NM_053903	Efna5	9.58066	9.52023	9.64749	9.16641	9.2202	8.70285	0.0303299	0.379844	1.4671	down
NM_001101000	Mapre2	8.48192	8.47865	8.63234	8.08589	8.10193	8.25322	0.00642992	0.277037	1.30491	down
NM_001106088	Erlin2	9.28583	9.20717	9.17257	8.54733	8.59306	8.33115	0.00111755	0.229909	1.66018	down
NM_001001085	Olr1254	4.26463	4.82747	4.52556	3.84761	3.75171	3.54932	0.0112305	0.297981	1.76909	down
NM_017003	Erbb2	6.80618	6.84058	6.71282	6.34328	6.33771	6.53784	0.00749645	0.287955	1.30157	down
NM_001017465	LOC361914	11.3987	12.0401	11.9018	10.8833	11.0693	10.3075	0.0269774	0.370675	2.0375	down
ENSRNOT00000022681	Serpinb1b	7.72034	7.73288	7.70125	7.05243	7.32483	7.18778	0.00259354	0.245251	1.44374	down
NM_001106505	Mrps5	7.39407	7.41153	7.39535	6.59055	6.66974	6.38559	0.000553862	0.229909	1.80461	down
NM_001109407	Dqx1	9.97771	10.1853	10.154	9.57073	9.42658	9.15012	0.00655346	0.277037	1.65083	down
NM_001013946	Akap8l	9.43304	9.27348	9.23745	8.80266	8.94273	9.01097	0.00994893	0.295082	1.31573	down
ENSRNOT00000058389	LOC100911032	8.68661	8.80576	8.72238	8.30772	8.11546	8.20763	0.00130793	0.231238	1.44191	down
ENSRNOT00000030978	AABR06024257.1	9.32606	9.61141	9.59008	9.04238	9.0934	8.62661	0.0277447	0.372425	1.50357	down
NM_001135782	Pramef8	11.2703	11.0606	11.2651	10.7459	10.7989	10.3659	0.0212978	0.351276	1.47606	down
NM_001271265	Jade3	5.30944	5.51352	5.31502	4.82604	5.127	4.78317	0.0213841	0.351923	1.38248	down
NM_001305130	Ehbp1	11.4319	11.8888	11.8404	11.2986	11.3027	11.2549	0.0405254	0.404496	1.35187	down
NM_001001351	Olr1517	8.12797	8.23828	8.28351	7.57387	7.56625	6.95614	0.0153864	0.321036	1.80396	down
NM_134330	Glyatl2	7.55291	7.30369	7.30385	7.04412	7.08367	6.80802	0.0269417	0.370675	1.32704	down
ENSRNOT00000055648	RGD1306519	6.11507	6.5467	6.51489	5.97289	5.8581	5.88044	0.0270422	0.370675	1.4029	down
ENSRNOT00000072649	AABR06003530.1	9.90725	9.8134	9.83812	9.47384	9.53712	8.94343	0.0483196	0.424426	1.44873	down
NM_001108638	Slc25a26	9.53585	9.06743	9.36022	8.69455	8.73803	8.28003	0.0198976	0.342216	1.68214	down
NM_001017481	Cep295nl	7.1777	7.20273	7.38507	6.80452	6.87166	6.94874	0.00801216	0.287955	1.30151	down
NM_001012000	Plscr4	8.42392	8.55478	8.59306	8.09194	8.26364	8.04944	0.00945616	0.294524	1.30941	down
ENSRNOT00000013551	Mkrn3	7.82025	7.77388	7.75193	7.29084	7.31563	6.98604	0.00562153	0.27323	1.49954	down
NM_017017	Hgf	7.59791	8.22671	8.21733	7.19175	7.13656	6.52142	0.0236287	0.362957	2.09083	down
ENSRNOT00000019453	RGD1563354	5.58536	5.78984	5.80553	5.4151	5.17534	5.10258	0.0136995	0.313688	1.4102	down
NM_001191919	Smcr8	10.4893	10.3955	10.4135	10.109	10.1436	9.80085	0.0211601	0.350618	1.33321	down
NM_001037791	Wdr43	6.22109	6.36191	6.4422	5.88759	5.94459	5.56032	0.0161281	0.325726	1.45825	down
NM_001106938	Gpr174	5.6487	5.63446	5.76372	5.3369	5.34224	4.88125	0.0350906	0.395201	1.40981	down
ENSRNOT00000072729	Hhat	5.71149	6.09091	5.85529	5.45697	5.54832	5.35959	0.0250014	0.368447	1.34811	down
NM_001034939	Nabp2	9.88047	10.309	10.2042	9.26692	9.32427	8.77332	0.00968411	0.295082	2.01348	down
NM_001191663	Gsx1	9.64023	9.68326	9.72215	9.35736	9.30525	8.91286	0.0261863	0.370577	1.4045	down
NM_017090	Gucy1a3	9.33801	9.2202	9.1975	8.81036	8.95832	8.61332	0.0136885	0.313688	1.37354	down
ENSRNOT00000009312	Neo1	11.209	10.6933	10.9073	10.3912	10.492	10.2877	0.0273515	0.370838	1.46025	down
NM_138514	Cyp2c13	4.52961	5.0961	5.15015	3.79715	3.69919	3.37729	0.00524837	0.273151	2.46356	down
NM_001000851	Olr807	4.60139	5.27389	4.58465	3.93377	3.77901	3.86702	0.0142717	0.31745	1.94537	down
ENSRNOT00000052206	AABR06103350.1	8.66617	8.55739	8.58479	7.9753	8.07541	7.23132	0.0348716	0.394825	1.79266	down
NM_001128138	Lcn12	6.28359	6.42283	6.38226	5.98965	5.9721	5.50793	0.0296653	0.37771	1.45363	down
NM_001004101	Klk4	6.29112	6.59526	6.63283	5.67374	5.72304	5.08669	0.0119158	0.301052	2.01658	down
ENSRNOT00000038109	LOC100910462	9.34826	9.52849	9.50314	8.40449	8.74918	8.16299	0.00468547	0.268539	2.02944	down
NM_021852	Epn2	9.78335	9.79141	9.85996	9.39338	9.45821	9.08716	0.013022	0.309065	1.4129	down
ENSRNOT00000067689	LOC100364854	6.70427	6.68171	6.71628	6.36404	6.14769	6.27716	0.00234381	0.245251	1.35453	down
ENSRNOT00000067067	Agbl2	7.40208	7.42772	7.41768	6.88928	6.94936	7.02889	0.000363387	0.229909	1.37552	down
NM_001009973	Kctd10	11.9713	12.0691	12.1162	11.4849	11.5202	11.1086	0.00793973	0.287955	1.6032	down
NM_033233	Prl3d4	8.94666	9.2525	9.29703	8.75835	8.66211	8.19562	0.0381646	0.398759	1.54404	down
NM_023963	Cdx2	6.86609	6.91514	6.80568	6.36611	6.40906	5.86866	0.021313	0.351276	1.56667	down
NM_031633	Foxm1	8.16061	8.38991	8.38166	7.70166	7.7092	7.11487	0.0189877	0.340797	1.7437	down
NM_001128099	Ly6al	6.59389	6.47027	6.67292	6.03641	5.94191	5.51487	0.0119131	0.301052	1.67942	down
NM_023103	Mug1	7.76545	7.83146	7.63537	6.91437	7.15554	6.45455	0.0134015	0.312254	1.86944	down
NM_198790	Rgsl2h	8.04361	8.14729	8.53136	7.61882	7.52261	7.29925	0.0124303	0.305038	1.69411	down
NM_001000553	Olr224	6.17966	6.36563	6.0933	5.88494	5.8251	5.58322	0.0214646	0.352462	1.36457	down
ENSRNOT00000071670	Olr1022	7.89312	8.83009	8.75743	7.4285	7.11376	7.0557	0.0159487	0.32477	2.45245	down
ENSRNOT00000073721	Clec18a	6.72277	6.91189	7.02702	6.50752	6.45352	6.07786	0.0286563	0.374965	1.4549	down
ENSRNOT00000042639	Ammecr1	7.8504	7.77674	7.79161	7.50399	7.43238	7.17235	0.0133713	0.312254	1.35348	down
ENSRNOT00000073272	LOC100909671	5.33525	5.60919	5.74699	5.16219	5.16062	4.93457	0.0285657	0.374955	1.39283	down
NM_030864	Mtr	8.88959	9.31384	9.23558	8.4859	8.4619	7.79625	0.0262128	0.370577	1.8639	down
NM_019263	Minpp1	10.3908	10.5767	10.603	10.0884	10.1718	10.0192	0.00577489	0.27323	1.34759	down
NM_001000013	Olr1434	10.828	10.4521	10.6178	10.0703	10.0698	10.0238	0.00624935	0.276828	1.49277	down
NM_001000054	Olr875	9.01866	9.24102	8.97267	8.65204	8.4681	8.04004	0.0256942	0.370577	1.61409	down
NM_001257095	LOC100360095	8.76295	8.72624	8.69766	8.21346	8.36623	7.98767	0.00840892	0.289637	1.4538	down
ENSRNOT00000072382	AABR06083125.1	9.54896	9.98577	9.9978	9.32839	9.25687	8.74312	0.0358403	0.396913	1.66407	down
NM_001024337	LOC500331	8.15712	8.27334	8.38991	7.71324	7.82986	7.53094	0.00610386	0.275171	1.49704	down
NM_001007673	Mmd	9.57662	9.30136	9.47496	9.046	9.00263	8.67674	0.0185763	0.338146	1.45652	down
ENSRNOT00000068586	RGD1566084	10.7213	10.189	10.5194	9.62086	9.52323	9.21016	0.00668239	0.277037	2.03517	down
ENSRNOT00000072251	AABR06064533.1	7.34499	7.49472	7.45872	7.14912	7.08591	6.86682	0.0145595	0.318169	1.31847	down
NM_001034127	Alg8	12.0326	11.3249	11.6434	11.0315	11.1035	10.5221	0.046584	0.419415	1.71868	down
NM_053333	Retnla	8.69571	8.54574	8.5832	8.33452	8.10994	8.08732	0.00901711	0.290427	1.34813	down
NM_001024334	LOC500300	8.44418	7.97183	8.24148	7.60562	7.18702	7.19674	0.0102007	0.295381	1.85237	down
NM_001191871	Zbtb40	5.56565	5.57208	5.43136	5.05729	5.34771	4.9281	0.0357176	0.396913	1.33053	down
NM_001128494	Lyc2	6.20003	5.86138	5.91517	5.49177	5.38297	5.18141	0.00997675	0.295082	1.55849	down
NM_001130578	Rps19bp1	6.17865	6.55196	6.52187	5.62807	5.81332	4.66209	0.0493961	0.429671	2.07005	down
ENSRNOT00000048929	Tgif2-ps1	10.2027	10.1476	10.1555	9.5492	9.80334	9.03892	0.035302	0.395565	1.6299	down
NM_001136162	Ttc13	6.80443	6.75747	6.94963	6.53612	6.14603	5.71938	0.0442825	0.412468	1.62826	down
NM_001109103	RGD1565212	9.93466	9.57278	9.75216	9.44637	9.4469	9.14904	0.0479963	0.423699	1.32478	down
ENSRNOT00000041583	AABR06020813.1	4.96826	4.17106	4.52176	3.84114	3.63057	3.91424	0.0367665	0.397751	1.69159	down
NM_001271398	Kirrel2	8.361	8.44819	8.44611	7.92477	8.00743	7.74618	0.00308046	0.250203	1.43957	down
NM_001106509	Chchd5	9.53318	9.30638	9.32454	8.96874	9.04835	8.71993	0.0179318	0.336732	1.39059	down
NM_001000752	Olr1350	7.17502	7.53832	7.56304	7.01824	7.08958	6.70302	0.0474325	0.421733	1.403	down
NM_001106140	Atp8b1	10.5408	10.9965	11.0113	10.3983	10.3849	10.0243	0.0422084	0.406203	1.49522	down
NM_001008851	RT1-M10-1	6.32396	7.26382	6.75669	5.87175	5.90154	5.24217	0.0327918	0.388315	2.15796	down
ENSRNOT00000073589	Trbv1	7.61612	7.83512	8.16271	7.09789	7.0803	7.04005	0.00749506	0.287955	1.73937	down
NM_001289935	Gpr52	5.29059	5.31304	5.21254	4.98155	4.95266	4.64247	0.0214813	0.352475	1.3316	down
NM_001025713	Magec2	4.58004	4.35255	4.59702	3.79443	3.59537	3.27272	0.00505204	0.272093	1.93951	down
NM_001000680	Olr500	4.71023	4.93099	4.98433	3.48417	3.6291	3.93955	0.00167424	0.234537	2.28297	down
NM_001013915	Tas2r134	7.70735	7.45101	7.58109	6.98571	6.99372	6.4902	0.0142357	0.31745	1.68951	down
NM_001106120	Usp6nl	8.44772	8.26404	8.28585	7.89674	7.95291	7.95583	0.00287374	0.245473	1.31711	down
NM_001029920	Vstm4	9.43351	9.45351	9.3182	8.17415	8.37167	6.96148	0.0240986	0.364347	2.96077	down
ENSRNOT00000041706	AABR06046451.5	8.74341	9.02326	9.10279	8.67272	8.57136	8.41707	0.0379104	0.397751	1.32204	down
ENSRNOT00000072260	Olfr1148	7.10614	7.16895	7.4061	6.69791	6.69451	6.58303	0.0045259	0.265029	1.48306	down
NM_001000361	Olr718	6.33221	6.59389	6.44207	5.96824	5.93382	5.90008	0.00263944	0.245473	1.43596	down
NM_001304740	Oprm1	10.8919	11.1229	11.0302	10.6736	10.7576	10.4207	0.0306715	0.38134	1.31741	down
NM_001000962	Olr1260	7.41388	7.19175	7.22348	6.93398	6.98116	6.73938	0.0181409	0.3371	1.31178	down
NM_001000683	Olr483	6.29082	6.11991	6.39192	5.63125	5.58055	5.4489	0.0017589	0.234537	1.64033	down
NM_001000573	Olr724	6.93231	7.22116	7.13605	6.67005	6.70768	6.44608	0.0145233	0.318169	1.40305	down
NM_144743	Ces2a	10.3619	10.3921	10.4887	9.90442	10.0907	9.66148	0.0152692	0.320364	1.44261	down
NM_001000252	Olr338	7.02702	7.37536	7.27167	6.34209	6.2132	5.53639	0.0115405	0.297981	2.28806	down
ENSRNOT00000055002	Prr14	9.88805	9.89159	10.2342	9.58602	9.70288	9.38927	0.0386787	0.398946	1.36153	down
NM_001191743	Samhd1	7.26372	7.26738	7.13413	6.85058	6.84992	6.69644	0.00330545	0.25317	1.34049	down
NM_001106687	Clspn	6.60009	6.66735	6.67658	6.28241	6.24345	5.92455	0.0126842	0.308499	1.41213	down
ENSRNOT00000038955	LOC100361746	4.62455	4.94779	5.00927	3.96352	4.37645	3.21931	0.0484935	0.424777	2.01035	down
ENSRNOT00000046383	Filip1l	12.7506	12.4205	12.5449	11.849	12.1279	11.2534	0.0395455	0.401711	1.77593	down
ENSRNOT00000036375	AABR06047980.1	7.05196	7.36714	7.44612	6.7506	6.84704	6.49243	0.0210035	0.350349	1.50703	down
NM_001014062	RGD1306195	4.88438	5.18803	4.89642	3.77301	3.82255	3.42769	0.00116544	0.229909	2.48836	down
NM_012620	Serpine1	6.80529	6.89545	6.83609	6.58575	6.34547	6.05236	0.0296897	0.37771	1.43172	down
NM_001025673	Cenpu	6.48853	6.51028	6.46331	5.93153	5.85973	5.91784	2.27085e-05	0.229909	1.49935	down
NM_017312	Bok	10.8714	10.75	10.83	10.2103	10.463	9.75462	0.032682	0.387962	1.59602	down
ENSRNOT00000075261	AABR06019459.1	10.3626	10.6198	10.3097	9.82639	10.039	9.85615	0.0108968	0.297981	1.43747	down
NM_001100986	Hipk1	10.6241	10.5007	10.7269	10.0131	10.066	10.0997	0.00135055	0.231238	1.47184	down
NM_001012209	Rnase12	6.08268	5.96364	6.03674	5.61027	5.57731	5.46115	0.00110388	0.229909	1.39292	down
NM_001109271	Ldlrap1	5.96057	5.90552	5.9904	5.67172	5.70545	5.31081	0.0389362	0.399006	1.30994	down
NM_001108467	Eps8l1	5.9721	6.1683	6.05944	5.44346	5.30054	4.48734	0.0309525	0.382418	1.98549	down
ENSRNOT00000067965	Zranb3	4.29828	4.78394	4.21225	3.69114	3.47014	3.74606	0.0155969	0.322477	1.73594	down
NM_031320	Celsr3	9.35258	9.43156	9.4593	9.06407	9.09756	8.75835	0.0172573	0.334257	1.35769	down
NM_057133	Nr0b2	5.82081	6.09362	5.93372	5.46639	5.38851	5.67552	0.019681	0.341397	1.35589	down
NM_001000445	Olr1232	5.73219	6.07952	5.88494	5.57658	5.31552	5.06668	0.0313794	0.384597	1.49411	down
NM_001099496	Vom2r29	4.94382	4.9566	4.92863	3.6563	3.83087	3.4231	0.000383628	0.229909	2.473	down
ENSRNOT00000066667	LOC100911639	6.05467	6.42971	6.45002	5.56479	5.5338	5.172	0.00786347	0.287955	1.85053	down
ENSRNOT00000039235	Szt2	9.19731	9.38535	9.39046	8.78976	8.8046	8.083	0.0360347	0.396913	1.69967	down
NM_001109222	Ppp1r3a	12.233	11.8731	12.0176	11.0423	10.9238	9.73161	0.0267837	0.370675	2.78049	down
NM_001000717	Olr1491	9.54216	8.77099	9.05948	8.42273	8.44622	7.95503	0.0370132	0.397751	1.80193	down
NM_173127	Prss3	7.73336	7.85356	7.78327	7.03606	6.98743	6.52236	0.00491577	0.271348	1.92045	down
ENSRNOT00000073225	Wdr64	11.259	10.9535	11.1417	10.2991	10.0799	8.92478	0.0362108	0.396913	2.54933	down
ENSRNOT00000074992	ENSRNOG00000049774	10.3167	9.90484	10.0443	9.59561	9.60599	9.51587	0.0142127	0.31745	1.43012	down
NM_001191944	Adamts18	5.79139	6.09967	5.98899	5.34383	5.28196	5.08266	0.00377721	0.26308	1.65161	down
ENSRNOT00000075778	Skint10	5.94387	6.29473	5.96824	4.6411	4.93179	4.79051	0.000810096	0.229909	2.43032	down
ENSRNOT00000039305	Ermap	11.0156	11.0455	11.0216	10.5794	10.5533	9.94726	0.031981	0.386187	1.58842	down
NM_001012192	Tssc1	9.43646	9.32941	9.25687	9.17659	8.91286	8.75126	0.0428243	0.408232	1.31404	down
NM_001024358	Glb1l3	4.54349	4.11887	4.2789	3.79067	3.64241	3.74324	0.0109843	0.297981	1.50348	down
NM_001106125	Spag6l	5.32893	5.31231	5.14881	4.93053	4.78804	4.80499	0.00443182	0.264736	1.33993	down
NM_022403	Tdo2	8.10837	7.64317	7.77661	6.97231	6.72158	5.81656	0.0238023	0.363545	2.53017	down
NM_001013043	Sectm1a	8.37913	8.55309	8.54193	8.17883	7.57569	7.52261	0.0282538	0.374955	1.66133	down
NM_001000558	Olr390	10.944	10.8789	10.9569	10.4708	10.567	10.5599	0.00055319	0.229909	1.31405	down
NM_133415	Necab2	11.809	11.9312	11.9194	11.4113	11.548	11.2743	0.00570566	0.27323	1.39025	down
NM_001109393	Timp4	14.2652	15.033	14.8708	13.4055	13.5633	12.6454	0.0144456	0.317655	2.86442	down
NM_001108198	Guca1b	6.11485	6.05126	6.12469	5.90631	5.44014	5.30237	0.041071	0.405451	1.46138	down
ENSRNOT00000076942	MLIP	10.6108	10.8083	10.8547	10.3457	10.2873	10.4141	0.00798512	0.287955	1.32766	down
NM_031540	F9	9.20884	8.81639	8.96182	8.49902	8.49255	8.26959	0.0137546	0.313688	1.48998	down
ENSRNOT00000073222	LOC689435	7.0426	6.75951	6.80802	6.23284	5.62301	4.65248	0.0432811	0.409839	2.57981	down
NM_001107195	Olfml2b	9.58155	9.66575	9.90685	8.31067	8.3173	8.02039	0.000406206	0.229909	2.83222	down
NM_017300	Baat	6.46752	6.25148	5.94995	5.35883	5.60881	5.74993	0.026119	0.370577	1.56967	down
NM_001172118	Sla2	10.307	10.0672	10.0634	9.03165	9.02677	8.39474	0.00421135	0.264736	2.51078	down
NM_053633	Egr2	10.2911	10.4165	10.2425	9.63311	8.67315	9.45168	0.0236072	0.362878	2.09076	down
NM_001000161	Olr139	7.53705	8.10442	8.09641	7.41853	7.23026	6.85322	0.0410675	0.405451	1.67631	down
NM_001000192	Olr204	8.02929	8.05928	8.02646	7.71228	7.5395	7.62893	0.00128019	0.231238	1.33001	down
NM_001000606	Olr780	5.41857	5.60947	5.40275	4.32404	4.46787	4.75516	0.00255641	0.245251	1.94698	down
NM_001109633	LOC691277	7.13129	7.01202	7.22639	6.83219	6.65676	6.32783	0.0320058	0.386187	1.43161	down
NM_001099459	Vom2r6	5.83499	6.05619	6.04999	5.25101	5.3763	5.04339	0.00336195	0.253982	1.68976	down
NM_001106712	Adgrf3	5.71797	5.92529	5.70508	5.08729	4.88461	5.05943	0.00126879	0.231238	1.70804	down
ENSRNOT00000034784	Ugt2b15	6.75669	6.7353	6.74731	6.33855	6.25579	6.43974	0.00168899	0.234537	1.3211	down
ENSRNOT00000072807	AABR06105519.1	9.23124	9.61486	9.62274	8.9405	8.93539	8.99272	0.0150058	0.319481	1.44735	down
NM_001000371	Olr769	6.3312	6.9126	6.88745	5.77318	5.81306	5.74344	0.0080786	0.287955	1.91038	down
ENSRNOT00000073633	AABR06052422.1	6.5679	6.67292	6.57738	5.49429	5.40781	4.41034	0.0126614	0.308499	2.8322	down
NM_001142304	LOC689770	6.82003	6.81473	6.77894	6.2811	6.24142	6.61908	0.0244818	0.365657	1.34168	down
NM_022188	Robo1	8.67794	8.84638	8.87054	8.22061	8.40186	8.34648	0.00419326	0.264736	1.39021	down
NM_001014024	Orai3	8.32247	8.2164	8.29781	7.91435	7.93086	7.56141	0.0187276	0.339091	1.39154	down
ENSRNOT00000050421	LOC685110	10.2044	9.66065	9.82847	9.46433	9.42697	9.31249	0.0410926	0.405451	1.41087	down
NM_031565	Ces1e	6.68323	6.36289	6.53198	5.53042	5.72086	6.06818	0.0145753	0.318169	1.68515	down
NM_173299	Np4	7.20288	6.64545	7.01824	6.36066	6.43014	5.96521	0.0323897	0.387682	1.62847	down
NM_012748	Stx2	11.1976	11.3936	11.3074	10.876	11.0165	10.4345	0.0467267	0.419415	1.43782	down
NM_001014251	LOC365778	7.31039	7.50787	7.44314	6.76094	6.74214	6.30062	0.00707689	0.285535	1.76447	down
NM_053551	Pdk4	6.49543	6.08876	6.02884	4.81209	4.63664	4.48616	0.000861776	0.229909	2.94727	down
ENSRNOT00000051410	AABR06046724.1	5.27787	5.80832	5.44439	4.50794	4.64693	3.99946	0.0110354	0.297981	2.18165	down
NM_001107441	Ccsap	9.62109	9.34938	9.38085	8.98072	9.05991	8.96542	0.00778445	0.287955	1.36455	down
ENSRNOT00000077028	Frmd7	8.03018	8.07639	8.19256	7.42953	7.62118	7.6899	0.00477995	0.268539	1.43347	down
NM_080906	Ddit4	14.6868	14.4841	14.6749	14.1454	14.2154	14.1199	0.00314701	0.251978	1.37083	down
NM_053708	Gbx2	10.3856	10.2906	10.1947	9.40945	9.56301	9.40772	0.000386629	0.229909	1.77798	down
NM_175586	Taar7b	6.44269	6.53853	6.43832	5.84357	6.06155	5.63924	0.00775391	0.287955	1.54228	down
NM_001107586	Cstf2t	6.75829	6.5971	6.72014	6.08497	6.12881	6.00629	0.000513194	0.229909	1.53527	down
ENSRNOT00000058838	Ncapg	6.19919	6.50194	6.417	6.05467	6.0675	5.8278	0.0308196	0.3821	1.30984	down
NM_001000026	Olr1482	5.30847	5.3754	5.42373	5.03341	5.12388	4.78274	0.0222621	0.357645	1.30966	down
NM_001000387	Olr416	7.71128	8.15366	8.08656	7.17395	7.30477	6.97555	0.00767705	0.287955	1.78066	down
ENSRNOT00000055734	Tas2r145	12.6772	12.6365	12.6022	11.5104	11.7261	11.3604	0.000517596	0.229909	2.15296	down
NM_022633	Galp	7.32007	7.4285	7.44242	6.99141	6.95575	6.59854	0.0139406	0.314331	1.46249	down
ENSRNOT00000071722	LOC100910813	7.38845	7.71048	7.63052	7.11101	7.057	6.67151	0.020291	0.34484	1.54754	down
ENSRNOT00000012726	Angptl7	5.74222	6.00463	5.79672	5.47799	5.30141	4.86367	0.0335987	0.390119	1.55133	down
NM_199490	Dsg4	4.67911	4.82806	4.67532	4.26543	4.49354	3.97723	0.0377107	0.397751	1.39677	down
NM_013112	Apoa2	5.32462	5.34224	5.50829	4.96315	4.94291	4.4384	0.0281716	0.374955	1.5265	down
NM_001105912	Snx8	10.237	10.4543	10.4419	9.62007	9.63954	9.68326	0.000558088	0.229909	1.65874	down
NM_001000206	Olr231	6.90748	7.88344	6.88672	6.37206	6.09727	6.20905	0.0417785	0.406203	1.99966	down
ENSRNOT00000076222	LOC100911918	8.27597	8.08116	8.13703	7.41077	7.38305	7.75841	0.00844314	0.28975	1.56625	down
NM_001000072	Olr1057	4.12092	4.48038	4.37834	3.69544	3.83739	4.05	0.0350047	0.395167	1.3809	down
NM_001171981	Sh3bp1	8.26001	7.78195	8.03319	7.15592	7.15215	7.55978	0.0189909	0.340797	1.66528	down
NM_001105870	Rtp1	8.22555	8.76728	8.69183	7.85767	7.80344	7.38253	0.0177086	0.336565	1.84081	down
NM_012977	Lgals9	9.27167	8.89739	8.99976	8.46727	8.37934	8.49674	0.00653521	0.277037	1.52466	down
NM_001013900	Ino80e	13.1407	12.727	12.8903	12.4045	12.376	12.2205	0.0117152	0.299362	1.50075	down
NM_031096	Grk1	5.0966	4.53265	4.49306	4.11386	4.10953	4.13612	0.0394767	0.401702	1.50275	down
NM_145184	Usp15	14.803	15.1279	15.0241	14.4262	14.6487	14.5778	0.020149	0.343846	1.35107	down
NM_001013899	Ubqlnl	15.0888	15.4255	15.3462	14.5234	14.6882	14.9849	0.0304386	0.38029	1.4688	down
NM_001000534	Olr1607	8.04604	7.76866	7.79732	7.17261	7.0706	7.6356	0.0413669	0.405495	1.49251	down
ENSRNOT00000065439	LOC102555919	8.93461	8.83779	8.86503	8.07813	8.13944	8.23967	0.000192345	0.229909	1.65488	down
ENSRNOT00000033775	Tmem139	7.12256	7.19836	7.19275	6.71387	6.62171	6.59299	0.000272344	0.229909	1.4423	down
ENSRNOT00000067506	Lrmp	9.53264	9.71475	9.70253	9.12088	9.13381	9.3745	0.012183	0.303621	1.35683	down
NM_001001384	Olr736	7.41894	7.54477	7.53319	7.01435	6.96103	7.09129	0.000985223	0.229909	1.3916	down
NM_021670	Bmp15	6.54299	6.26492	6.20844	5.80685	5.93596	5.60338	0.0170952	0.333186	1.47093	down
NM_175579	Wnk4	9.04225	8.94373	9.02785	8.74466	8.60744	8.26788	0.0327676	0.388282	1.37995	down
NM_012787	Cyp2g1	7.57068	7.61233	7.5105	7.17433	6.92709	6.87049	0.00422145	0.264736	1.48851	down
NM_001000014	Olr1436	7.21406	7.3472	7.14621	6.83367	6.63738	6.79841	0.00475808	0.268539	1.3941	down
NM_001319645	LOC103695172	6.24631	6.21272	6.01821	5.45848	5.51309	4.86824	0.0157817	0.323134	1.83928	down
NM_001109558	Setd7	9.26209	9.22658	9.2344	8.68419	8.80878	8.53511	0.00210413	0.240875	1.47939	down
NM_001270871	Adgrg2	6.69722	6.87585	6.8314	6.14769	6.18701	5.89287	0.00244114	0.245251	1.65362	down
NM_001304424	Spag11bl	7.41611	7.43175	7.30912	7.00441	6.76874	6.79298	0.00324559	0.25317	1.44421	down
ENSRNOT00000068774	Myrfl	5.40216	5.46408	5.5059	4.85533	4.73118	4.28003	0.00924712	0.291693	1.78411	down
NM_001008806	Krt4	10.4987	10.3574	10.3918	9.76281	9.87656	10.197	0.0263044	0.370622	1.38555	down
NM_001109125	RGD1564428	6.09144	6.20615	6.19919	5.74148	5.59322	5.91114	0.0135955	0.313404	1.33513	down
NM_001001273	Olr132	11.9319	11.9614	12.0727	11.2598	11.2215	11.6055	0.00839822	0.289637	1.54371	down
NM_001009534	Fam115e	11.2986	10.4801	10.8633	9.03916	8.94234	9.60495	0.0058195	0.27323	3.21585	down
NM_001126294	Ddias	6.75907	6.99273	6.92688	6.30816	6.42386	6.41013	0.00285663	0.245473	1.4262	down
ENSRNOT00000019418	Pgpep1l	11.3706	10.8461	11.1125	9.8281	9.83279	9.79811	0.00105124	0.229909	2.44537	down
NM_001009499	Ly49i3	6.69488	6.43997	6.50687	5.71699	5.80715	6.33366	0.0452739	0.41548	1.5101	down
NM_001109550	Magea4	6.28241	6.03306	5.86172	5.00106	4.6415	4.62146	0.00167812	0.234537	2.46979	down
NM_019144	Acp5	9.82925	9.73553	9.77723	9.47325	9.45134	9.18449	0.0131557	0.310415	1.32959	down
NM_001105780	Sec24a	8.91399	9.25863	9.29926	8.8729	8.67042	8.71621	0.0417369	0.406179	1.32328	down
NM_001106241	Rinl	7.80103	7.95118	7.99183	7.41292	7.21441	7.23227	0.00186421	0.238215	1.54557	down
ENSRNOT00000074150	Itsn2	11.8747	11.6237	11.7511	10.9735	11.1581	11.354	0.0110916	0.297981	1.50313	down
ENSRNOT00000050913	LOC100912868	10.9637	10.8438	10.7415	10.0306	9.93402	10.3924	0.0089181	0.290245	1.6594	down
NM_001000325	Olr560	9.53664	9.6842	9.80476	9.018	9.13084	9.2927	0.00898203	0.290245	1.44195	down
NM_001134746	Lrrtm4	10.3557	10.3099	10.2938	9.8989	9.81231	9.96567	0.000886572	0.229909	1.3449	down
NM_024380	Gucy2e	5.62263	5.66661	5.84139	5.39654	5.21928	4.99301	0.0195966	0.341397	1.42135	down
NM_001108930	Vpreb3	8.17441	8.09434	8.12562	7.55218	7.41786	7.87609	0.0201164	0.343846	1.43007	down
NM_001107925	Ifnk	6.06056	5.96124	5.91249	4.73698	4.34035	5.56794	0.0395744	0.401711	2.13811	down
NM_001004079	Bpi	9.39724	9.53402	9.44567	9.00263	8.98703	9.01696	0.000368163	0.229909	1.37247	down
NM_001000130	Olr56	7.85356	8.03492	8.01655	7.5484	7.47201	7.68934	0.0097349	0.295082	1.31807	down
NM_001007751	MGC94207	9.70886	9.60976	9.66398	9.19903	9.25481	9.35618	0.00195905	0.238809	1.31118	down
NM_001302749	LOC100363178	6.17882	6.36404	6.43443	5.78829	5.85295	5.76538	0.00289864	0.245473	1.4375	down
NM_001044299	LOC690784	7.95281	8.26022	8.21436	7.55954	7.4922	7.80814	0.0182687	0.3371	1.43644	down
ENSRNOT00000075380	LOC100911631	6.06713	6.13906	6.01321	5.32564	5.32297	5.85896	0.0349569	0.395167	1.48515	down
ENSRNOT00000066779	AABR06058714.1	4.69088	4.96809	4.8477	4.32073	4.51684	4.25026	0.0139181	0.314331	1.38794	down
NM_001000520	Olr1346	9.06545	9.14996	9.12117	8.65961	8.69766	8.53737	0.000902227	0.229909	1.39537	down
ENSRNOT00000040702	AABR06046430.3	9.8745	9.94014	9.92798	9.48631	9.33177	9.51804	0.0015381	0.231238	1.38399	down
NM_017270	Adh4	8.17704	7.74588	8.05382	7.31339	7.21457	7.64785	0.0306829	0.38134	1.51604	down
NM_001009527	Vom1r86	8.52325	8.73957	8.91482	8.3015	8.21048	8.4287	0.0335865	0.390119	1.33083	down
NM_001008969	Vom1r31	7.20569	7.69415	7.71802	6.58725	6.14645	6.86459	0.0197431	0.341397	2.00906	down
NM_001008855	RT1-N3	8.20501	8.25396	8.36553	7.76769	7.77519	8.05506	0.0180934	0.3371	1.32763	down
NM_001107543	Ubqln3	11.0465	11.0511	11.1695	10.5891	10.6373	10.8325	0.00890478	0.290245	1.32203	down
NM_022920	Grm6	9.68549	9.56082	9.60762	9.09975	8.89299	9.31963	0.0161182	0.325726	1.42785	down
ENSRNOT00000071339	LOC100910611	6.64136	6.66229	6.77495	5.99324	5.89741	6.42865	0.0254159	0.370426	1.50153	down
NM_053303	Cxcr5	10.6821	10.9514	10.9792	10.4182	10.3797	10.6712	0.0443325	0.412468	1.30242	down
NM_001047866	Cntnap5c	7.93086	7.91018	8.02278	7.32421	7.51723	7.6868	0.0156589	0.322477	1.3615	down
NM_001109232	Ccdc126	6.36476	6.44057	6.4201	5.98847	5.9713	6.09651	0.000999871	0.229909	1.31014	down
NM_153728	Soat2	8.18328	8.32758	8.35047	7.68963	7.76115	8.1106	0.0365396	0.397751	1.35034	down
NM_001001089	Olr1391	6.7629	6.56575	6.61923	6.23152	6.09091	6.464	0.0351852	0.395565	1.30781	down
ENSRNOT00000049456	LOC367365	8.09719	7.7986	7.82977	7.41153	7.34481	7.70495	0.0444154	0.412468	1.33925	down
ENSRNOT00000073387	Fcamr	5.28709	5.42115	5.50371	4.71962	4.9566	5.12986	0.0253257	0.370189	1.38379	down
NM_130426	Tnfrsf1b	6.86682	6.55046	6.67203	6.06155	6.20112	6.50091	0.0498732	0.432593	1.35841	down
NM_001101019	LOC689757	15.2566	15.6443	15.5244	15.0015	15.0397	15.2366	0.04796	0.423621	1.30361	down
ENSRNOT00000072897	Ildr2	9.80033	9.55706	9.49109	9.20301	9.16771	9.17886	0.0102105	0.295381	1.35001	down
NM_001191929	Dusp27	6.99292	7.28041	7.25954	6.69627	6.56616	6.91148	0.0295917	0.37771	1.36887	down
ENSRNOT00000070982	AABR06082486.1	6.9081	6.83723	6.9256	6.38605	6.36905	6.72763	0.0298245	0.37771	1.31592	down
NM_001047967	LOC501233	4.59467	5.40633	4.67393	3.90309	3.0948	3.65411	0.0189376	0.340522	2.53323	down
ENSRNOT00000040879	LOC100910526	4.32495	3.74847	4.61605	3.44802	3.53298	3.40711	0.0408259	0.405451	1.70186	down
NM_001000425	Olr1111	7.53058	7.88995	7.79878	7.34703	7.227	7.4399	0.0318377	0.386187	1.32115	down
NM_001198580	Naca	6.96922	7.39135	7.49909	6.79659	6.40323	6.82094	0.0438144	0.410568	1.5294	down
NM_001106036	Nrl	12.6696	12.5675	12.5989	12.0241	11.9772	12.2058	0.00202828	0.238809	1.45697	down
NM_001106846	Cldn2	7.61329	7.85665	7.92185	7.2011	7.03783	7.50645	0.0299657	0.378806	1.46287	down
NM_001108742	Slc41a2	12.093	11.8606	11.9238	11.141	11.2083	11.687	0.0296333	0.37771	1.5302	down
NM_138902	Ear11	12.3203	11.8834	12.1348	11.4571	11.5151	11.7528	0.0259114	0.370577	1.45179	down
ENSRNOT00000067042	Rorc	7.03875	7.23782	7.40648	6.69009	6.49823	6.94199	0.0360835	0.396913	1.43155	down
NM_001108591	Rnf24	10.7217	10.5342	10.654	10.0349	9.9388	10.26	0.00704663	0.285192	1.47298	down
NM_017292	Gabrr2	5.75353	5.92285	6.38376	4.97737	5.20054	5.36006	0.0183615	0.3371	1.79094	down
NM_001000719	Olr1488	10.3532	10.9325	10.9392	9.84141	10.0452	10.3136	0.046812	0.419514	1.59646	down
NM_214824	Olr1365	4.66635	5.00128	5.47917	3.95442	3.85198	4.50373	0.0382977	0.398759	1.92593	down
NM_001000634	Olr665	7.19739	7.46483	7.54409	7.05209	6.70727	7.07457	0.0447514	0.413446	1.37312	down
NM_001081980	Tbc1d10c	7.38986	7.6521	7.28229	6.23543	6.6585	6.58642	0.00514483	0.273151	1.92915	down
ENSRNOT00000033929	RGD1562036	7.71035	7.46063	7.54739	7.02003	6.82918	7.18741	0.0114885	0.297981	1.47487	down
NM_001105720	Nfkbia	12.2058	12.0229	12.0389	11.5341	11.4644	11.5393	0.0008043	0.229909	1.49132	down
ENSRNOT00000022270	Dsg2	4.52639	4.80445	4.96877	4.09068	4.13116	4.273	0.0128104	0.308499	1.51739	down
NM_001108279	Bcl6b	8.57	8.08266	8.16081	7.79732	7.64807	7.83422	0.0339757	0.391468	1.42532	down
ENSRNOT00000032301	Lacc1	6.49947	6.4457	6.71821	5.92675	6.25521	6.25922	0.0419953	0.406203	1.32629	down
ENSRNOT00000074994	AABR06047320.2	5.60311	6.24681	6.49695	5.0273	4.87729	5.35061	0.0265876	0.370675	2.04282	down
NM_001000195	Olr210	7.46386	7.85566	8.0324	6.84466	7.00327	7.38088	0.037685	0.397751	1.6332	down
ENSRNOT00000003382	Chrna9	6.89499	7.05681	7.10713	6.286	6.30031	6.76989	0.0295951	0.37771	1.48203	down
NM_031696	Gpr88	10.8825	11.7197	11.3008	9.19812	9.99012	9.5561	0.00667573	0.277037	3.29333	down
NM_001106007	Pgm2	7.07634	7.1539	7.28	6.6377	6.87326	6.82503	0.0136918	0.313688	1.31168	down
NM_001024344	Sit1	9.36791	9.37978	9.45351	8.54453	8.68553	9.20797	0.0446891	0.413217	1.50287	down
NM_001102431	Prnd	6.04486	5.97265	6.17291	5.69059	5.3096	5.58601	0.0138883	0.314331	1.44868	down
NM_001034140	Baiap2l1	8.04788	8.05776	8.18485	7.40091	7.64436	7.90815	0.0435159	0.409976	1.36197	down
NM_001047960	LOC500702	7.31898	7.12215	7.31531	6.69166	6.9044	6.95483	0.017848	0.336732	1.3212	down
ENSRNOT00000004893	RGD1563947	5.58666	5.99582	6.30752	5.28554	4.82687	5.31536	0.0350318	0.395167	1.76632	down
ENSRNOT00000030798	Alpk1	5.64205	6.26437	6.20923	5.31594	5.3718	5.24275	0.0227728	0.360707	1.65679	down
NM_012546	Drd1	10.42	11.2894	10.8438	9.35369	10.0395	9.67179	0.0220453	0.357227	2.23879	down
ENSRNOT00000041781	RGD1560203	4.9281	5.30883	5.48794	3.45663	3.94044	3.8578	0.00259325	0.245251	2.80889	down
NM_145782	Cyp3a18	4.8632	4.85614	5.01086	3.91701	4.39789	4.57141	0.0383694	0.398923	1.53117	down
NM_001271376	Cpamd8	6.77786	6.76049	7.02504	6.00272	5.93256	6.60309	0.0422256	0.406203	1.59661	down
ENSRNOT00000071145	LOC100912371	5.36875	4.9281	5.43908	4.38937	4.4349	4.76881	0.0232298	0.362434	1.64067	down
NM_001008886	RT1-S3	8.07406	7.97702	7.87239	7.25883	7.51138	7.52487	0.00649528	0.277037	1.45679	down
NM_001000005	Olr1407	6.77495	7.32091	7.43832	6.48429	6.32532	6.60874	0.0328226	0.388315	1.63046	down
NM_001191843	Atp6ap1l	8.46852	8.41568	8.3024	7.52842	8.02405	7.82921	0.0167994	0.332607	1.51744	down
NM_001007670	Odf4	4.80629	4.80883	5.00872	4.23536	3.90527	3.64065	0.00682926	0.279936	1.92855	down
NM_022959	Rassf9	6.29169	6.464	6.57612	5.9742	5.84429	6.23433	0.0393459	0.401463	1.34381	down
ENSRNOT00000075088	Wrn	6.90682	7.08667	6.98888	6.36923	6.44269	6.6287	0.00525567	0.273151	1.42792	down
NM_012742	Foxa1	7.87696	8.08763	8.18382	7.55054	7.54313	7.75061	0.018491	0.337255	1.35164	down
NM_001100653	Sidt1	4.82775	4.58356	4.9042	4.22151	4.13389	3.6462	0.0192392	0.340887	1.70681	down
NM_001108209	Prss40	4.70817	4.40097	4.64627	3.84878	4.09291	4.3119	0.037502	0.397751	1.41481	down
NM_001108763	Ppcdc	4.82687	5.02155	4.81397	4.20016	4.61687	4.52595	0.0372619	0.397751	1.35642	down
ENSRNOT00000044960	LOC102554637	8.58421	8.42427	8.68335	7.7873	7.88155	8.23879	0.0192439	0.340887	1.51019	down
NM_001001005	Olr1171	5.02535	4.52705	4.78394	3.84259	4.0535	4.18846	0.0128992	0.309008	1.68249	down
ENSRNOT00000071743	Nol11	6.13419	5.94106	6.06579	5.40428	5.81119	5.59897	0.0274992	0.371284	1.35867	down
ENSRNOT00000076951	RGD1562948	6.56853	6.6463	6.74307	5.60085	5.82576	6.22343	0.0151885	0.319883	1.70443	down
NM_001000118	Olr20	6.03874	6.34125	6.24856	5.82176	5.70565	5.24235	0.0353835	0.395565	1.53645	down
ENSRNOT00000036769	RGD1563323	7.03734	7.52197	7.62132	6.87413	6.82977	6.84876	0.0399213	0.40279	1.45665	down
NM_001008943	Vom1r62	7.26027	8.04709	7.9014	6.93904	6.66735	7.19537	0.048422	0.424777	1.74392	down
NM_001000518	Olr1283	7.79	8.08452	8.06447	7.14762	7.34193	7.6726	0.0303624	0.379916	1.50763	down
NM_022590	Slc5a2	10.3496	10.2959	10.3196	9.62338	9.5549	10.0141	0.0147702	0.318752	1.50617	down
ENSRNOT00000072700	LOC100910851	6.49226	6.60462	6.54655	6.08282	6.17168	5.77351	0.0125528	0.307023	1.45244	down
NM_001191730	Shroom4	7.0908	6.98513	6.81289	6.43843	6.51395	6.76763	0.0385657	0.398946	1.31003	down
NM_001107007	Slc5a10	8.08076	8.16554	7.99892	7.27429	7.26676	7.86906	0.0407223	0.4053	1.52806	down
NM_153732	Zfp597	8.25508	7.83783	7.86803	7.48277	7.61007	7.62812	0.0435628	0.409976	1.33175	down
ENSRNOT00000060904	Ipo11	6.36235	6.47794	6.57853	5.8927	6.02138	6.13768	0.0084701	0.290162	1.37144	down
ENSRNOT00000065142	LOC100360051	10.6178	10.9095	10.8674	10.1688	10.0402	10.4535	0.0192505	0.340887	1.49216	down
ENSRNOT00000042649	Hemgn	10.0096	10.1294	10.0956	9.40838	9.386	9.57278	0.000829065	0.229909	1.5395	down
NM_170667	Rln3	4.29037	3.9438	4.04184	3.71335	3.75992	3.51296	0.02832	0.374955	1.34717	down
NM_001277260	Tnnt1	10.2236	9.64312	9.86185	9.35901	9.48274	9.42448	0.0479371	0.423588	1.40197	down
NM_001108693	Rbp7	5.6837	5.25431	5.36292	4.31848	4.48403	5.10171	0.0420317	0.406203	1.73978	down
NM_001107291	Itih1	4.3948	4.54349	4.74651	4.18876	4.19302	4.1253	0.0196824	0.341397	1.31273	down
NM_001000575	Olr741	10.3174	10.4575	10.3597	9.80575	9.87118	10.2425	0.046463	0.418865	1.32411	down
NM_182816	Amigo2	12.9813	13.135	13.3186	12.4262	12.4956	12.7986	0.0190546	0.340887	1.48604	down
NM_001000131	Olr50	11.4709	11.234	11.3303	10.8025	10.8763	11.1346	0.0288315	0.374965	1.32619	down
NM_001000312	Olr510	5.93406	6.49051	6.19078	5.4426	5.36502	5.668	0.0181195	0.3371	1.63949	down
NM_001099477	Vom2r70	4.4573	4.40994	4.42818	3.52139	3.80311	2.77673	0.0254895	0.370459	2.09178	down
NM_001000950	Olr162	4.2652	4.66062	4.28231	3.59152	3.56181	2.56767	0.0321049	0.386213	2.23826	down
ENSRNOT00000072122	AABR06047962.1	5.03486	5.41287	4.79788	4.2789	4.173	4.09882	0.00855182	0.290245	1.86386	down
NM_001000533	Olr1581	6.51633	6.73728	6.58545	5.98607	5.96086	6.17489	0.00366464	0.26308	1.48701	down
ENSRNOT00000071037	LOC100911926	5.80446	5.96253	6.15869	5.45459	5.61719	5.67354	0.0318687	0.386187	1.31353	down
NM_001033959	Obp3	6.54817	6.16752	6.31569	5.84659	5.91394	6.11056	0.0468546	0.41955	1.30746	down
NM_001033674	Bicd2	7.08242	7.50074	7.36248	6.69656	6.85269	6.97368	0.0320172	0.386187	1.38918	down
NM_001002285	Mrgprx2l	5.35256	5.31628	5.43372	4.82146	5.03285	5.02817	0.00641365	0.277037	1.32564	down
ENSRNOT00000071884	Dpy19l2	4.00775	4.37158	4.13787	3.61518	3.64026	3.55834	0.00650942	0.277037	1.48227	down
NM_001000960	Olr1292	8.56477	8.50064	8.63202	8.04361	7.90868	8.27862	0.0129757	0.309065	1.40332	down
NM_053944	Pcdh12	3.81871	4.27125	4.65731	3.21746	3.40132	2.77482	0.0215828	0.352833	2.17029	down
NM_001001101	Olr1530	5.99156	5.64356	5.53687	5.21378	5.30118	4.98026	0.0288656	0.374965	1.47317	down
ENSRNOT00000033510	Ttn	5.0228	5.17286	4.65481	4.34497	4.41497	4.43159	0.0239931	0.364347	1.46712	down
ENSRNOT00000076423	Bud31	12.99	12.8872	12.9066	12.3059	12.2666	12.7519	0.0375158	0.397751	1.40105	down
NM_022194	Il1rn	6.97628	7.03126	6.98449	6.28064	6.37152	6.84869	0.0484022	0.424777	1.41134	down
NM_001106149	RGD1563060	6.32418	6.0543	6.05236	5.30109	5.59069	5.76495	0.0220404	0.357227	1.50668	down
ENSRNOT00000050888	AABR06097983.1	9.15522	9.26941	9.24845	8.41694	8.46208	8.95331	0.0248966	0.368126	1.53006	down
NM_001000933	Olr490	6.53356	6.6367	6.69893	6.13658	6.05498	6.39556	0.0196435	0.341397	1.34477	down
NM_001000386	Olr415	10.464	10.3762	10.4043	9.47222	9.58342	10.1792	0.0387474	0.398946	1.59094	down
NM_001105873	Tm4sf19	9.74546	9.7531	9.87205	9.39912	9.36443	9.43836	0.00108446	0.229909	1.31	down
ENSRNOT00000028194	Ntf4	7.64504	7.80652	7.61161	7.2677	7.17587	7.44515	0.0169454	0.33317	1.31174	down
NM_001013893	Actl9b	9.61141	9.77239	9.80589	9.1945	9.17743	9.54099	0.0327426	0.388194	1.34312	down
